# Supplementary material
Source: PubMed Central journal article supplement (PMC2396705)
Supplement: 0709764105_Supplemental_PDF.pdf [file 0709764105_Supplemental_PDF.pdf]

# Supporting Information

Singh *et al.* 10.1073/pnas.0709764105

## SI Methods

**Phenotype Data.** Phenotypes for 209 bacterial species with fully sequenced genomes were collected from the literature, including Bergey's Manual (1), NCBI Microbial Genomes ([www.ncbi.nlm.nih.gov/genomes/lproks.cgi](http://www.ncbi.nlm.nih.gov/genomes/lproks.cgi)), and TIGR Genome Properties (2). We gathered qualitative information on habitat, metabolism, electron source, electron donor, and scored whether the species had a number of phenotypes: motility, spore-formation, transformability for DNA; as well as whether it is anaerobic, an extremophile, or Gram-positive (Table S1).

**Building Phylogenetic Profiles.** To build phylogenetic profiles of stress responses, we used 61 genes in chemotaxis, 153 genes in spore-formation, and 62 genes in competence (Tables S2–S4). These genes were chosen after extensive literature search of each stress response, including separate experimental evidence (genetic, biochemical, or high-throughput expression data) for each gene in the model organisms *B. subtilis* for endospore formation and chemotaxis, and *B. subtilis* and *H. influenzae* for competence (33 and 29 genes, respectively). For comparison, an additional complete analysis was performed with *E. coli* chemotaxis genes as the starting set and the statistical results were confirmed to be qualitatively similar to those reported here (data not shown). DNA and amino acid sequences for all genes were retrieved from the MicrobesOnline website on October 8, 2006 and their orthologs were identified by a three-way bidirectional best hit algorithm as previously described (3), with the additional constraint that the sequence alignment coverage had to be at least 75% of the length of both genes. For phylogenetic profiles, a species was marked as having a gene if it had at least one ortholog, but possibly also multiple paralogs, of the gene. Ortholog sets for transcriptional regulators and histidine kinases, which are known to have highly conserved domains (4, 5), were manually curated to remove spurious hits by examining the phylogenetic tree for each ortholog set. Nucleotide and amino acid alignments were performed using Muscle (6) with  $\text{max\_iters} = 3$  and  $\text{diags} = 1$  (paralogs were discarded before the alignment step). Phylogenetic trees were built from aligned amino acid sequences using PhyML (7) with default optimization parameters and 100 bootstrap replicates, and visualized on the iTOL tree viewer (<http://itol.embl.de>).

**Criteria for Module Classification.** To decide the optimal number of clusters for gene dendrograms, we calculated the mean silhouettes (8) for cuts along each gene tree producing two to 10 clusters, and chose the partition with maximal mean silhouette over all clusters. The same number of genes randomly chosen (1,000 iterations) from either the *B. subtilis* genome (for sporulation and chemotaxis) or a proportional mixture of the *B. subtilis* and *H. influenzae* genomes (for competence) was also analyzed over a range of cluster sizes. We confirmed that the mean cluster silhouettes for the random genes (0.3) were significantly lower than those of the network genes (0.6),  $P < 10^{-6}$ .

To decide which gene clusters derived from a global application of silhouette were statistically significant and coherent enough to be denoted as evolutionary modules, we used the mean cluster silhouette, described above, as well as  $D$ , the mean Euclidean distance between phylogenetic profiles, and  $C$ , a coherence measure explained below. We used  $D$  to test that the phylogenetic profiles are more similar between module genes than the same number of genes randomly chosen (1,000 iterations) from (i) the genomes as above; or (ii) the network. We also

used  $C$ , the coherence measure, to test that module genes approximate an all-or-none distribution, with most species either having nearly all module genes or almost no module genes.  $P$  values for significance for all of these measures were calculated by resampling genes repeatedly until the first exception occurred (e.g., until  $D$  for the random case exceeded  $D$  for the module), and the number of trials recorded. Thus, a gene cluster was denoted an evolutionary module if both its mean cluster silhouette and coherence  $C$  were significantly higher and its mean  $D$  (Euclidean distance between phylogenetic profiles) significantly lower ( $P \leq 10^{-3}$ ) than for a random gene cluster of the same size (1,000 iterations) drawn from either the *B. subtilis* genome (for sporulation and chemotaxis) or a proportional mixture of the *B. subtilis* and *H. influenzae* genomes (for competence).

**Partitioning Sporulation Clusters.** Applying clustering and silhouette analysis to the sporulation gene set produced two “modules.” The first module consisted of promiscuous genes like sigma factors, oligopeptide transporters (*opp* and *app* genes), and a few two-component response regulators. The second module was dominated by genes found exclusively in sporulators. Detailed inspection of the gene- and species-clustered phylogenetic profile of the gene set (Fig. S3), and the associated gene dendrogram (Fig. S4) revealed, however, that there are finer structures within the sporulator-specific cluster. These structures were not captured by silhouette analysis, which is a conservative criterion prone to miss fine structure if data sets are structured across multiple levels of resolution. To follow up on this observation, we successively applied the silhouette analysis to the large sporulator-specific cluster, uncovering two tight subclusters and a third diffuse one. Each of these three subclusters had an interesting biological interpretation when examined in the context of the phenotype data we collected. The three clusters discovered thus are the ones reported in Table S5 as well as in the main text of the paper.

The entire “subcluster” analysis above was also applied to chemotaxis and DNA uptake modules; however those modules did not further split into smaller clusters by this method, and hence are reported as such.

**Coherence Measure C.** Most commonly used distance metrics like Euclidean or Hamming have the feature that they weigh zeros equally to ones when applied to binary data (such as that found in phylogenetic profiles). If the data set has structure on a single level of resolution, or if the data set is not sparse, this is not a problem. If, however, there are multiple levels of resolution, and if one of these “smaller” scales consists of “sparse” vectors with very few ones and many zeros, this can create a problem if the goal is to identify modules. For example, if the matrix

$$A = \begin{bmatrix} 1 & 0 & 0 & 0 & 0 & 0 & 0 & 0 & 0 & 0 & 0 & 0 & 0 & 0 & 0 \\ 0 & 0 & 1 & 0 & 0 & 0 & 0 & 0 & 0 & 0 & 0 & 0 & 0 & 0 & 0 \\ 0 & 1 & 0 & 0 & 0 & 0 & 0 & 0 & 0 & 0 & 0 & 0 & 0 & 0 & 0 \\ 0 & 0 & 0 & 1 & 0 & 0 & 0 & 0 & 0 & 0 & 0 & 0 & 0 & 0 & 0 \end{bmatrix}$$

[1]

were a phylogenetic table representing the presence or absence of genes (rows) in species (columns) and a Euclidean distance metric were applied to the genes, the result would be very short distances between all pairs of genes because most of each vector consists of zeros. These distances would likely be much smaller than one would obtain from a random gene set, and thus a

“significant cluster” in this sense, especially if the gene profiles were rows in a larger non-sparse data set (lots of ones) being analyzed. However, one would not want to call this gene set a module because the genes are not distributed in such a way that most species either have all of the genes or none of them (the fundamental idea of module as evolutionary building block), as in the profile below with the same intergenic distances:

$$A' = \begin{bmatrix} 1 & 0 & 0 & 0 & 0 & 0 & 0 & 1 & 0 & 0 & 0 & 1 & 1 & 1 & 0 \\ 0 & 0 & 1 & 0 & 0 & 0 & 0 & 1 & 0 & 0 & 0 & 1 & 1 & 1 & 0 \\ 0 & 1 & 0 & 0 & 0 & 0 & 0 & 1 & 0 & 0 & 0 & 1 & 1 & 1 & 0 \\ 0 & 0 & 0 & 1 & 0 & 0 & 0 & 1 & 0 & 0 & 0 & 1 & 1 & 1 & 0 \end{bmatrix}. \quad [2]$$

To avoid the possibility of misclassifying a sparse cluster as a evolutionary module due to this issue, we introduced a “coherence” measure  $C$ .  $C$  is defined as the percentage of all species with any module genes (over a minimum noise threshold 5%) that have almost all module genes (over 75%). We calculated  $C$  for all putative modules, as well as for random gene clusters of the same size (1,000 iterations) drawn from either the *B. subtilis* genome (for sporulation and chemotaxis) or a proportional mixture of the *B. subtilis* and *H. influenzae* genomes (for competence). From these data we calculated  $P$  values to test for significant cohesion (putative modules with  $P \geq 10^{-3}$  were rejected). Of all of the clusters selected by the silhouette criterion and found otherwise statistically significant and thus candidate modules, one cluster from the competence network was rejected as a module based on failing this “coherence” test (see Fig. S13). The remaining clusters were sufficiently cohesive to be called modules (see Table S5).

**Classifying Genes According to Engineering Ontology.** Biological stress responses have been previously compared to engineering control systems (9) with separate, well-defined components organized in one or more feedback loops to sense the stress, process information, and regulate and actuate the response. To classify genes as “sensor,” “regulator,” “actuator,” or “cross-talk,” we amalgamated annotation terms from the GO ontology (10), COG functional categories (11), genome annotation, and literature searches on individual pathway genes. We placed genes into a category if they had at least one, but preferably two or more exact matches to terms from that category and no matches with terms from other categories.

#### Sensor

GO:0007165 “signal transduction” but not “two-component signal transduction”  
 GO:0004871 “signal transducer activity”  
 GO:0016020 “membrane”  
 GO:0016021 “integral to membrane”  
 COG0642 “signal transduction histidine kinase”  
 COG0840 “methyl-accepting chemotaxis protein”  
 COG2202 “FOG: PAS/PAC domain”  
 “sensor receptor”

Plus any proteins that control if and when the cell will “exit” from the response (literature search and examination of expression profile time courses).

#### Regulator

GO:0000160 “two component signal transduction system (phosphorelay)”  
 GO:0050906 “detection of stimulus during sensory perception”  
 GO:0006352 “transcription initiation”  
 GO:0016481 “negative regulation of transcription”  
 GO:0016987 “sigma factor activity”  
 GO:0006355 “regulation of transcription, DNA-dependent”  
 GO:0003700 “transcription factor activity”

GO:0003677 “DNA binding”  
 GO:0000166 “nucleotide binding”  
 COG functional classes K, D, T  
 COG1191 “DNA-directed RNA polymerase specialized sigma subunit”  
 COG1192 “ATPases involved in chromosome partitioning”  
 COG1989 “DNA-binding protein”  
 COG2002 “regulators of stationary/sporulation gene expression”  
 COG2201 “chemotaxis response regulator”  
 COG0784 “FOG: cheY-like receiver”  
 “transcription initiation”  
 “transcriptional regulator”

Note that, for classification as a regulator, we do not search on the obvious annotation keyword “DNA-binding” because there are DNA-binding proteins in the competence pathway that bind to single- or double-stranded DNA for the purpose of taking up naked DNA, and not for the purpose of explicitly regulating cellular processes.

#### Cross-talk

Same classification as regulator, above, plus known to regulate one or more pathways (literature search).

#### Actuator

Varies from pathway to pathway because it depends on the specific function of the pathway and what mechanism the cell must employ to respond to the stressor(s). Typically, after all genes in the pathway have been classified as either sensors, regulators, or cross-talk, the actuators are classified as those genes expressed after the main “switch” or commitment signal of the stress response [CheY for chemotaxis (12), Spo0A for sporulation (13), ComK for competence (14)]. For pathways like sporulation, which have multiple switches and checkpoints in the form of sigma factors, the genes under transcriptional control of each sigma factor serve as actuators.

**$K_a/K_s$  Calculations.** The  $K_a/K_s$  ratio for each gene was calculated by an all-pairs algorithm implemented in the Synonymous-Nonsynonymous Alignment Program (15) and also verified by repeating the calculation using the codeml tool of PAML (16) with runmode = -2 and NSSites = 0. Because  $K_a/K_s$  tends to saturate for distantly related orthologs that have accumulated multiple synonymous changes after divergence from the last common ancestor (17), we undertook two corrective measures. First, we calculated  $K_a/K_s$  values only for gene families that had near-identical phylogenetic profiles, with orthologs in closely related species. This meant that we consistently used the same set of closely related species, which limited any potential variation that might be introduced from distantly related species pairs when averaging pairwise  $K_a/K_s$  measurements. For sporulation genes, we calculated  $K_a/K_s$  measurements just for orthologs among the 18 spore-formers (Table 1). Second, pairwise gene comparisons for which  $K_s > 3$  were discarded before calculating the average  $K_a/K_s$  for an ortholog set.

**mpi Calculations.** To measure the evolutionary coherence of each module, the mean and median percent protein alignment identity (mpi) for each gene was calculated using the Bio package of Perl (www.bioperl.org), and then averaged over all genes in each module (Tables S2–S4). To test whether the mpi for each module was significantly distinct, we used the Kruskal–Wallis nonparametric analysis of variance test (18, Ch. 10). Since the mpi measurements had several outliers (Table S5) and were not necessarily normally distributed, this test was more suitable and robust than one-way ANOVA.

**Phenotypic and Functional Enrichment Calculations.**  $P$  values for functional and phenotypic enrichment were calculated by comparison with the hypergeometric distribution (18).

1. Boone DR, Castenholz RW, Garrity GM, eds (2001) *Bergey's Manual of Systematic Bacteriology* (Springer, New York).
2. Selengut JD, et al. (2007) TIGRFAMs and Genome Properties: Tools for the assignment of molecular function and biological process in prokaryotic genomes. *Nucleic Acids Res* 35:D260–D264.
3. Tatusov RL, Koonin EV, Lipman DJ (1997) A genomic perspective on protein families. *Science* 278:631–637.
4. Grebe TW, Stock JB (1999) The histidine protein kinase superfamily. *Adv Microb Physiol* 41:139–227.
5. Aravind L, Walker DR, Koonin EV (1999) Conserved domains in DNA repair proteins and evolution of repair systems. *Nucleic Acids Res* 27:1223–1242.
6. Edgar RC (2004) MUSCLE: Multiple sequence alignment with high accuracy and high throughput. *Nucleic Acids Res* 32:1792–1797.
7. Guindon S, Gascuel O (2003) A simple, fast, and accurate algorithm to estimate large phylogenies by maximum likelihood. *Syst Biol* 52:696–704.
8. Kaufman L, Rousseeuw PJ (2005) *Finding Groups in Data: An Introduction to Cluster Analysis* (Wiley, Hoboken, NJ).
9. Bourret RB, Stock AM (2002) Molecular information processing: Lessons from bacterial chemotaxis. *J Biol Chem* 277:9625–9628.
10. Ashburner M, et al. (2000) Gene ontology: Tool for the unification of biology. *Nat Genet* 25:25–29.
11. Tatusov RL, et al. (2003) The COG database: An updated version includes eukaryotes. *BMC Bioinformatics* 4:41.
12. Wadhams GH, Armitage JP (2004) Making sense of it all: Bacterial chemotaxis. *Nat Rev Mol Cell Biol* 5:1024–1037.
13. Sonenshein AL, Hoch JA, Losick R (2002) *Bacillus Subtilis and Its Closest Relatives: From Genes to Cells* (ASM Press, Washington, DC).
14. Dubnau D (1999) DNA uptake in bacteria. *Annu Rev Microbiol* 53:217–244.
15. Korber B (2001) HIV sequence signatures and similarities. *Computational and Evolutionary Analysis of HIV Molecular Sequences*, eds Rodrigo AG, Learn GH (Kluwer, Boston), pp 55–72.
16. Yang Z (1997) PAML: A Program Package for Phylogenetic Analysis by Maximum Likelihood. *Comput Appl Biosci* 13:555–556.
17. Nekrutenko A, Makova KD, Li WH (2002) The  $K_A/K_S$  ratio test for assessing the protein-coding potential of genomic regions: An empirical and simulation study. *Genome Res* 12:198–202.
18. Gibbons JD, Chakraborti S (2003) *Nonparametric Statistical Inference* (Marcel Dekker, New York).
19. Moszer I, Jones LM, Moreira S, Fabry C, Danchin A (2002) SubtiList: The reference database for the *Bacillus subtilis* genome. *Nucleic Acids Res* 30:62–65.
20. Kanehisa M, Goto S, Kawashima S, Okuno Y, Hattori M (2004) The KEGG resource for deciphering the genome. *Nucleic Acids Res* 32:D277–D280.
21. Alm EJ, et al. (2005) The MicrobesOnline Web site for comparative genomics. *Genome Res* 15:1015–1022.
22. von Mering C, et al. (2005) STRING: Known and predicted protein–protein associations, integrated and transferred across organisms. *Nucleic Acids Res* 33:D433–D437.

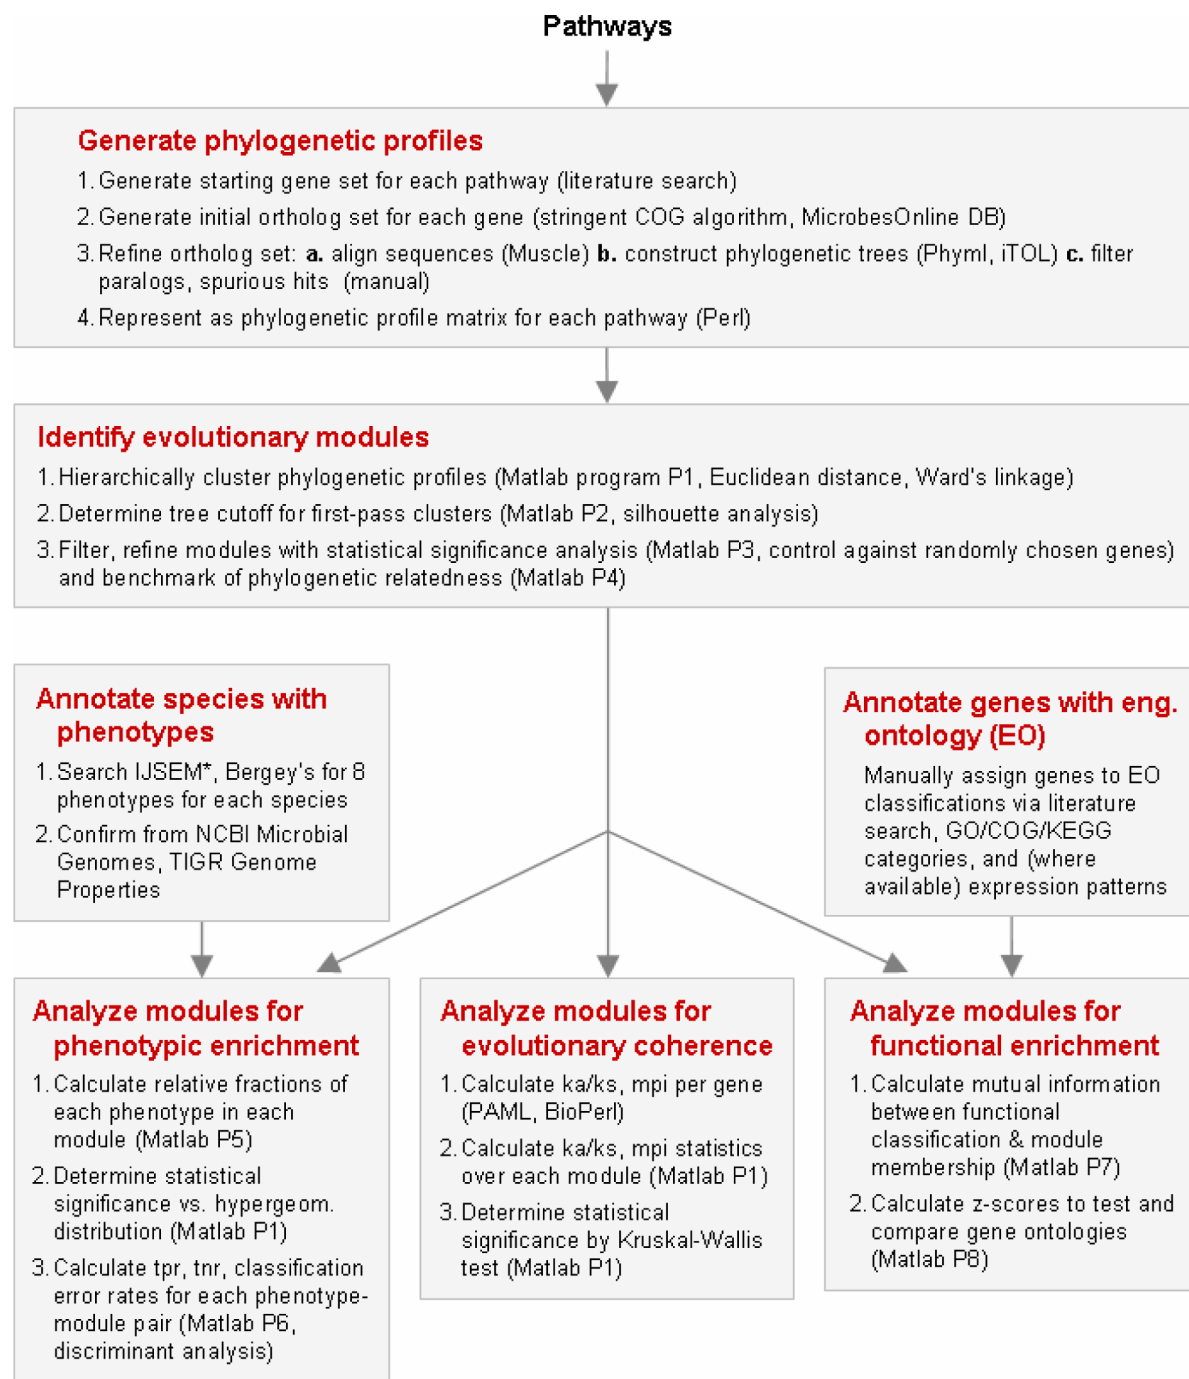

**Matlab programs:** P1: evmodules.m, P2: silh.m, P3: rand\_control.m, P4: phylo\_benchmark.m, P5: clust\_composition.m, P6: sens\_spec.m, P7: mut\_info.m, P8: zscores.m

\*IJSEM: International Journal of Systematic and Evolutionary Microbiology

**Fig. S1.** Flowchart of methodology and analysis. Code and data are available at <http://genomics.lbl.gov/evmod/>.







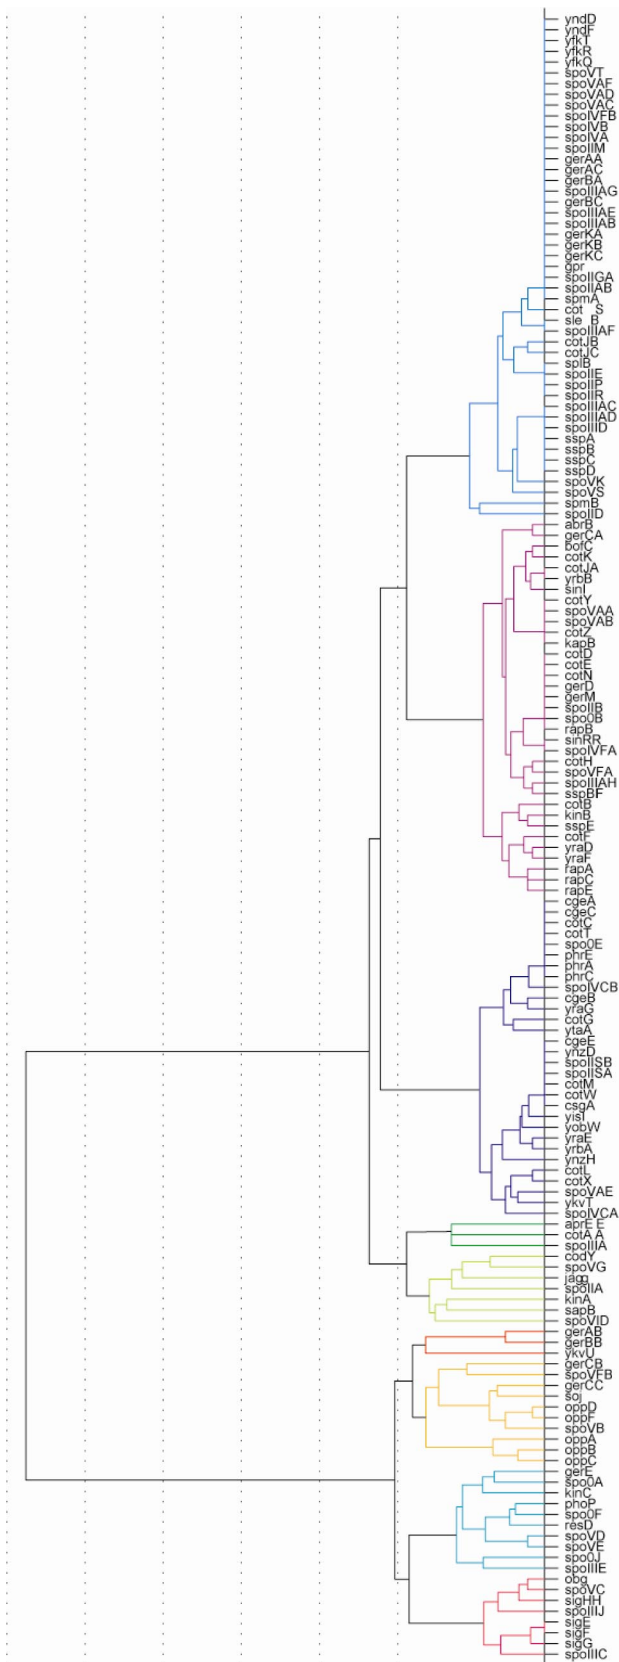

Fig. S4. Sporulation gene dendrogram.











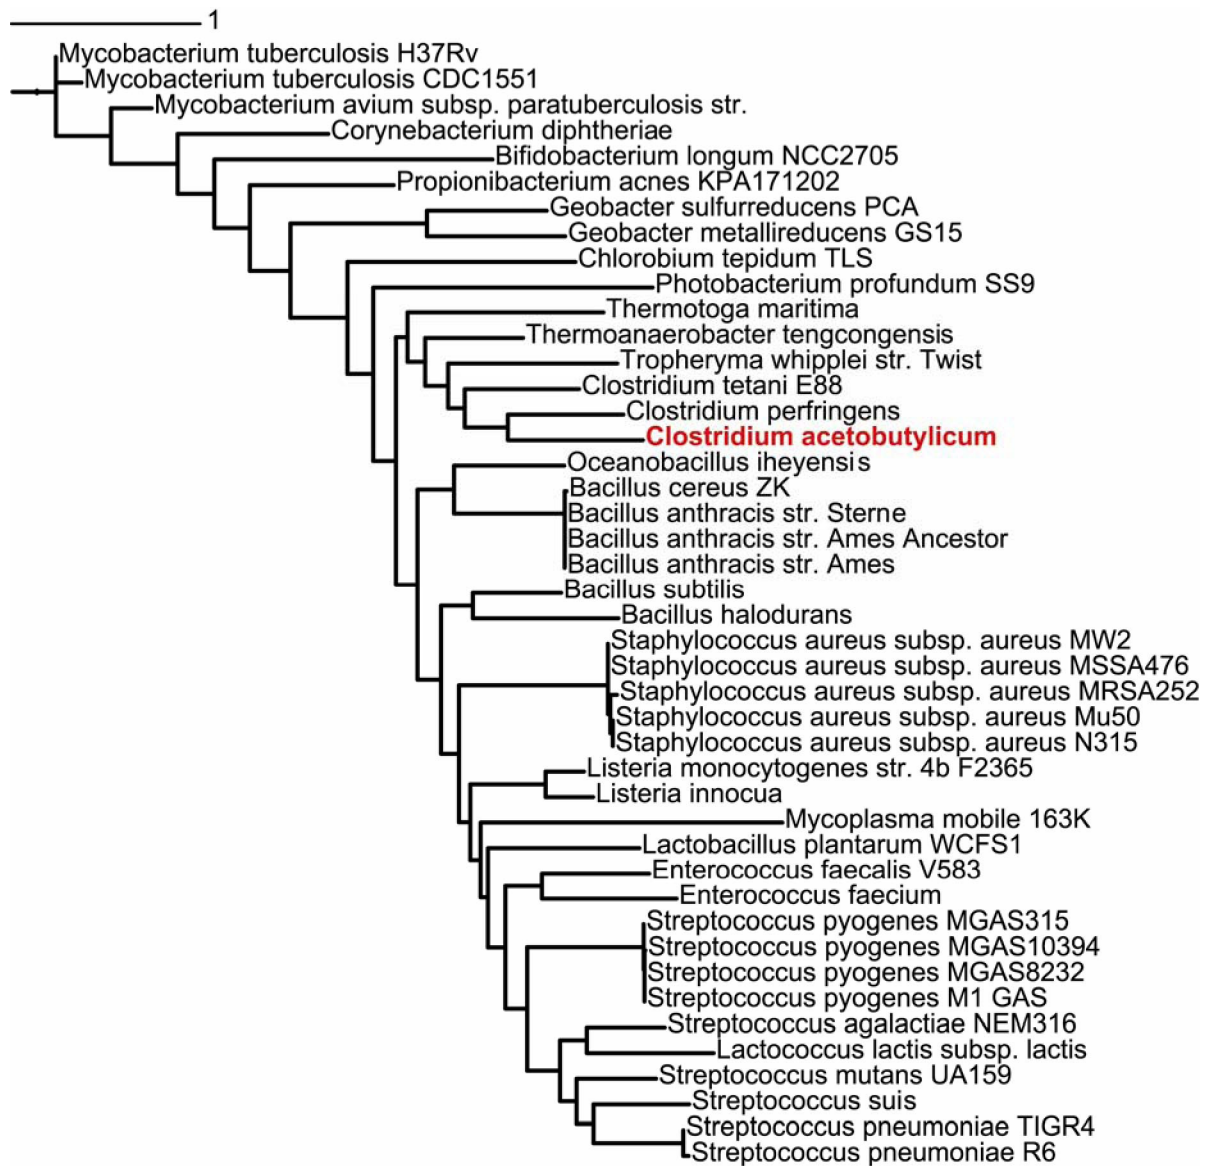

**Fig. S9.** Maximum-likelihood phylogenetic tree of orthologs of ComEA, an integral membrane protein found in Gram-positive transformable that makes up part of the “pore” which ingests DNA into the cell. *C. acetobutylicum* and related *Clostridia* cluster as expected according to the reference tree.









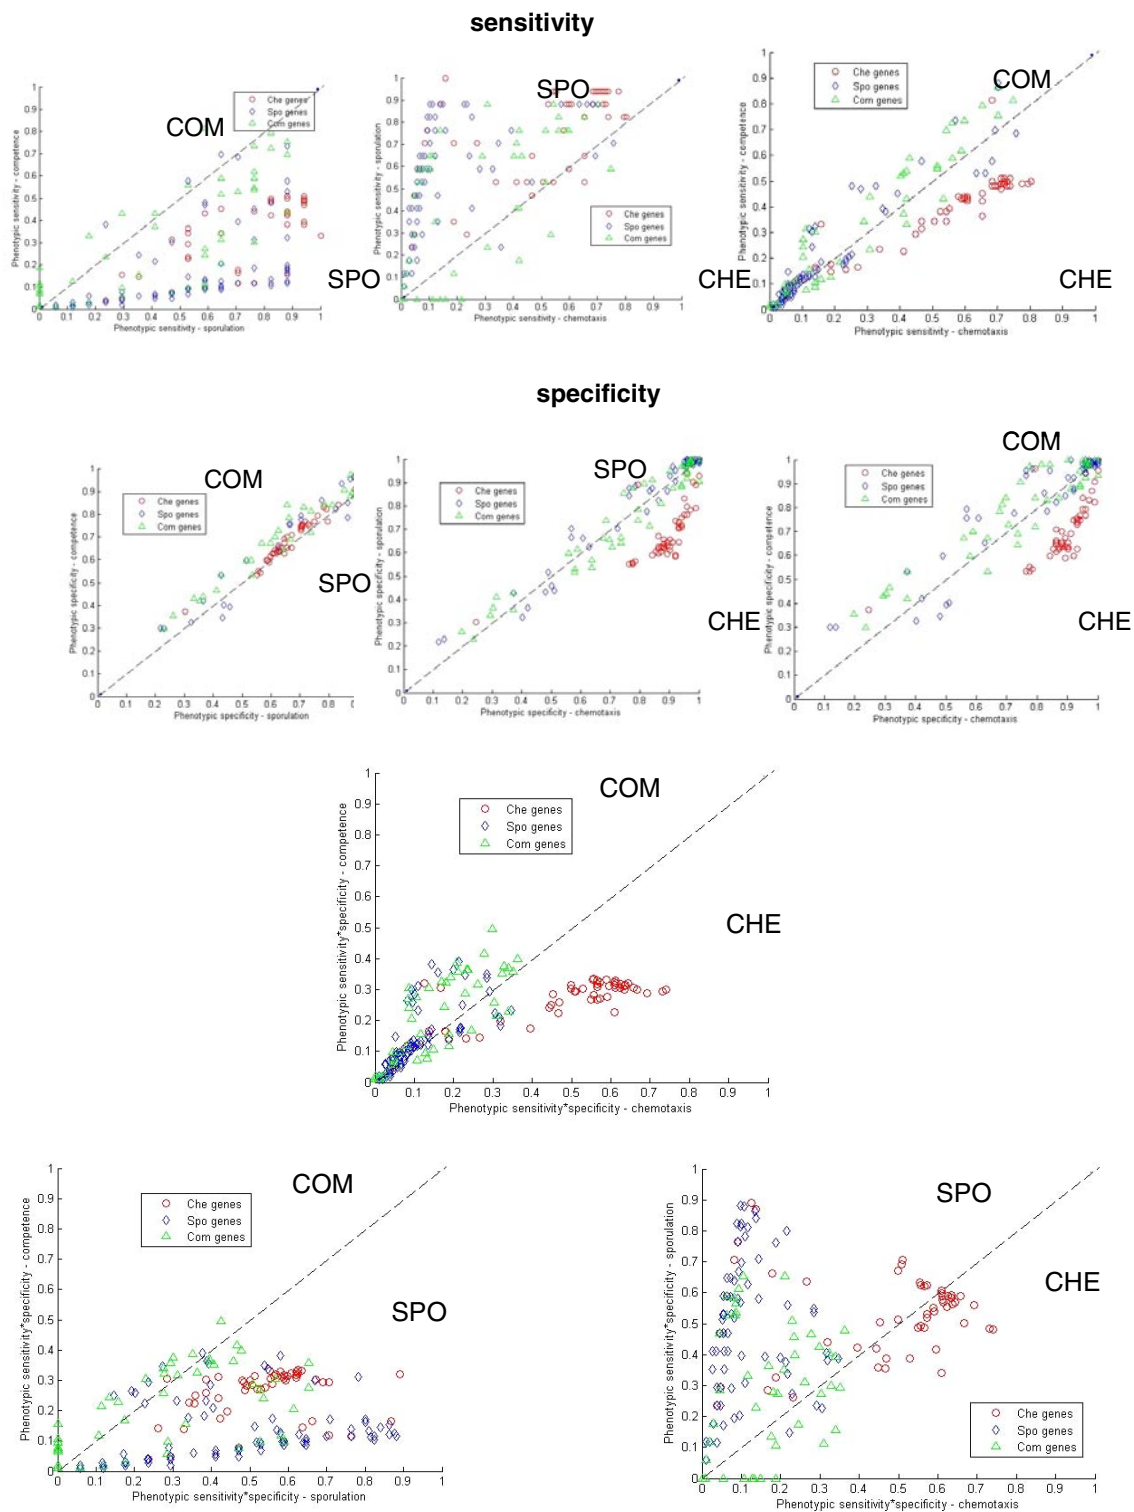

**Fig. S12.** True positive/true negative rates for all three gene sets and all three cross-phenotype pairs.

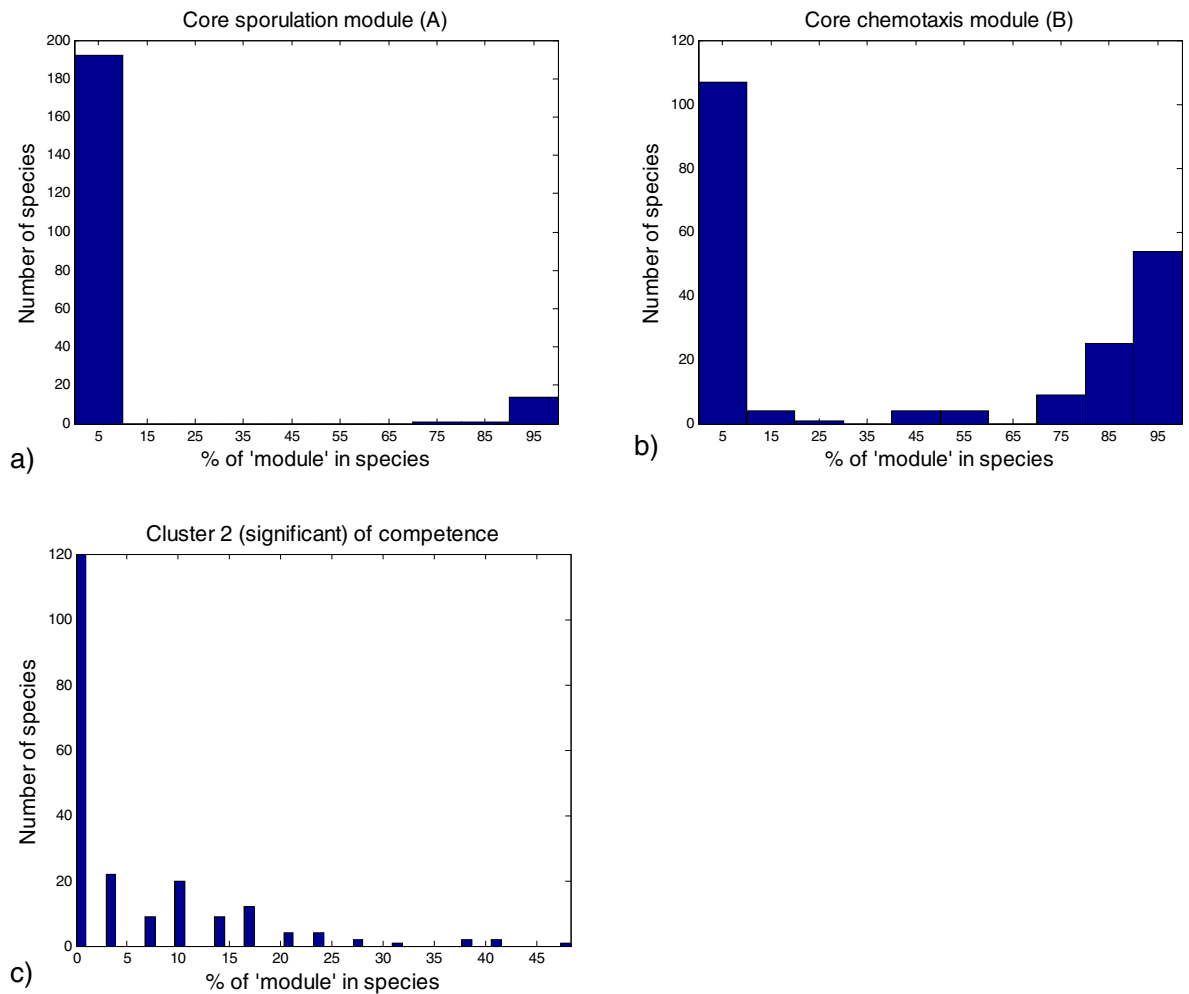

**Fig. S13.** Cluster coherence histograms. These plots show the distribution of module genes over all bacterial and archaeal species in our data set. Vertical bars show the number of species containing each possible fraction (x axis) of module genes in their genomes. Modules in the chemotaxis (a) and sporulation (b) pathways have the property that most species have either nearly all of the genes in the module or almost none of them, as evidenced by the histogram peaks near 100% and 0% of module genes. This is consistent with the idea of evolutionary modules as evolutionary building blocks a level of resolution above that of genes. Of the two gene clusters within the competence network identified by silhouette analysis, only one was found to be statistically significant (cluster 2). However, we do not call this cluster a evolutionary module because unlike the others, the genes in this set do not have an approximately all-or-none distribution (c). No species has more than about 48% of the cluster genes, and the histogram does not appear bimodal. See [SI Methods](#) and [Table S2](#) for our translation of this “coherence” requirement into the formal metric C.

**Table S1. Phenotypes for 207 species. Literature references for each row, as well as a downloadable version of this table, can be found online at <http://www.embl.de/~singh/evmod/>.**

| No. | Tax ID | Species                                             | C src      | Electr. src | Electr. accep. | Habitat                            | Ani | Pla | Ana | Mot | Com | Spo | Extr | Gm+ |
|-----|--------|-----------------------------------------------------|------------|-------------|----------------|------------------------------------|-----|-----|-----|-----|-----|-----|------|-----|
| 1   | 62977  | Acinetobacter sp.ADP1                               | org        | org         | O              | water, soil, organisms             | +   | -   | -   | -   | +   | -   | -    | -   |
| 2   | 56636  | Aeropyrum pernix                                    | org        | inorg       | O2             | coastal thermal vent               | -   | -   | -   | +   | -   | +   | -    | -   |
| 3   | 181661 | Agrobacterium tumefaciens str.C58 (Cereon)          | org        | org         | O2             | soil, plant stems                  | -   | +   | -   | +   | -   | -   | -    | -   |
| 4   | 180835 | Agrobacterium tumefaciens str. C58 (U. Washington)  | org        | org         | O2             | soil, plant stems                  | -   | +   | -   | +   | -   | -   | -    | -   |
| 5   | 224324 | Aquifex aeolicus VF5                                | inorg      | inorg       | O2, NO3        | deep sea hydrothermal vent         | -   | -   | -   | +   | -   | +   | -    | -   |
| 6   | 2234   | Archaeoglobus fulgidus                              | inorg      | inorg       | SO4, S2O3      | warm water, subsurface oil fields  | -   | -   | +   | +   | -   | +   | -    | -   |
| 7   | 354    | Azotobacter vinelandii                              | org        |             | O              | soil, water                        | -   | -   | -   | +   | +   | +   | -    | -   |
| 8   | 261594 | Bacillus anthracis str. 'Ames Ancestor'             |            |             |                | soil, mammalian tissues            | +   | -   | +   | -   | +   | +   | -    | +   |
| 9   | 198094 | Bacillus anthracis str. Ames                        |            |             |                | soil, mammalian tissues            | +   | -   | +   | -   | +   | +   | -    | +   |
| 10  | 260799 | Bacillus anthracis str. Sterne                      |            |             |                | soil, mammalian tissues            | +   | -   | +   | -   | +   | +   | -    | +   |
| 11  | 222523 | Bacillus cereus ATCC10987                           |            |             |                | soil, mammalian tissues            | +   | -   | +   | +   | +   | +   | -    | +   |
| 12  | 226900 | Bacillus cereus ATCC14579                           |            |             |                | soil, mammalian tissues            | +   | -   | +   | +   | +   | +   | -    | +   |
| 13  | 288681 | Bacillus cereus ZK                                  |            |             |                | soil, mammalian tissues            | +   | -   | +   | +   | +   | +   | -    | +   |
| 14  | 86665  | Bacillus halodurans                                 | org        |             |                | salt lakes                         | -   | -   | +   | +   | +   | +   | -    | +   |
| 15  | 290609 | Bacillus licheniformis ATCC14580                    | org, inorg | org, inorg  |                | soil, humans                       | +   | -   | /   | +   | +   | +   | -    | +   |
| 16  | 279010 | Bacillus licheniformis DSM13                        | org, inorg | org, inorg  |                | soil, humans                       | +   | -   | /   | +   | +   | +   | -    | +   |
| 17  | 1423   | Bacillus subtilis                                   | org        | org         | O2             | soil, water                        | -   | -   | +   | +   | +   | +   | -    | +   |
| 18  | 281309 | Bacillus thuringiensis serovar konkukian str. 97-27 |            |             |                | soil, insects                      | +   | -   | /   | +   | +   | +   | -    | +   |
| 19  | 817    | Bacteroides fragilis                                | org        | org         | org            | lower intestinal tracts            | -   | -   | +   |     |     | -   | -    | -   |
| 20  | 226186 | Bacteroides thetaiotaomicron VPI5482                | org        | org         | ferm           | mammalian soft tissue              | -   | -   | +   |     |     | -   | -    | -   |
| 21  | 283166 | Bartonella henselae str. Houston1                   |            |             | O              | cats, humans, fleas                | +   | -   | -   |     |     | -   | -    | -   |
| 22  | 283165 | Bartonella quintana str. Toulouse                   |            |             | O              | fixed tissue cells, erythrocytes   | +   | -   | -   |     |     | -   | -    | -   |
| 23  | 264462 | Bdellovibrio bacteriovorus HD100                    | org        | org         | O              | soil, sewage, aquatic              | -   | -   | -   | +   |     | -   | -    | -   |
| 24  | 206672 | Bifidobacterium longum NCC2705                      | org        | org         | ferm           | mammalian intestines, feces        | -   | -   | +   |     |     | -   | -    | -   |
| 25  | 257310 | Bordetella bronchiseptica RB50                      | org        | org         | O              | animal respiratory tracts          | +   | -   | -   | +   | +   | -   | -    | -   |
| 26  | 257311 | Bordetella parapertussis str12822                   | org        | org         | O              | human and sheep respiratory tracts | +   | -   | -   | -   | +   | -   | -    | -   |
| 27  | 257313 | Bordetella pertussis Tohamal                        | org        | org         | O              | human respiratory tracts           | +   | -   | -   | -   | +   | -   | -    | -   |
| 28  | 224326 | Borrelia burgdorferi B31                            | org        | org         | ferm           | arthropod, vertebrate hosts        | +   | -   | -   | +   |     | -   | -    | -   |
| 29  | 290434 | Borrelia garinii PBI                                |            |             |                | ticks, animals, humans             | +   | -   | +   | +   |     | -   | -    | -   |
| 30  | 375    | Bradyrhizobium japonicum                            | org        | org         | O2             | soil, plant root hairs             | -   | -   | -   | +   | +   | -   | -    | -   |
| 31  | 29459  | Brucella melitensis                                 | org        | org         | O2, NO2        | hoofed mamals                      | +   | -   | -   | -   |     | -   | -    | -   |
| 32  | 204722 | Brucella suis str1330                               | org        | org         | O2, NO3        | swine, reindeer                    | +   | -   | -   | -   |     | -   | -    | -   |
| 33  | 107806 | Buchnera aphidicola str. APS (Acyrtosiphon pisum)   |            |             |                | aphid gut                          | +   | -   |     | -   | -   | -   | -    | -   |
| 34  | 224915 | Buchnera aphidicola str. Bp (Baizongia pistaciae)   |            |             |                | aphid gut                          | +   | -   |     | -   | -   | -   | -    | -   |
| 35  | 198804 | Buchnera aphidicola str. Sg (Schizaphis graminum)   |            |             |                | aphid gut                          | +   | -   |     | -   | -   | -   | -    | -   |
| 36  | 243160 | Burkholderia mallei ATCC23344                       |            |             |                | animals, humans                    | +   | -   |     | -   | +   | -   | -    | -   |

| No. | Tax ID | Species                                        | C src      | Electr. src | Electr. accep. | Habitat                               | Ani | Pla | Ana | Mot | Com | Spo | Extr | Gm+ |
|-----|--------|------------------------------------------------|------------|-------------|----------------|---------------------------------------|-----|-----|-----|-----|-----|-----|------|-----|
| 37  | 272560 | Burkholderia pseudomallei K96243               | org        | org         | O              | soil, animals                         | +   | -   | -   | +   | +   | -   | -    | -   |
| 38  | 266265 | Burkholderia xenovorans                        |            |             |                | animals                               | +   | -   |     | +   | +   | -   | -    | -   |
| 39  | 197    | Campylobacter jejuni                           | org        | org, inorg  |                | animals                               | +   | -   | +   | +   | +   | -   | -    | -   |
| 40  | 203907 | Candidatus Blochmannia floridanus              |            |             |                | symbiont of carpenter ants            | -   | -   |     |     |     | -   | -    | -   |
| 41  | 190650 | Caulobacter crescentus CB15                    | org        | org         | O2             | fresh water, soil                     | -   | -   | -   | +   |     | -   | -    | -   |
| 42  | 83560  | Chlamydia muridarum                            | org        | org         |                | warm & cold-blooded animals           | +   | -   |     | -   | -   | -   | -    | -   |
| 43  | 813    | Chlamydia trachomatis                          | org        | org         |                | warm & cold-blooded animals           | +   | -   |     | -   | -   | -   | -    | -   |
| 44  | 227941 | Chlamydomydia caviae GPIC                      | org        | org         |                | warm & cold-blooded animals           | +   | -   |     |     | -   | -   | -    | -   |
| 45  | 115711 | Chlamydomydia pneumoniae AR39                  | org        | org         |                | warm & cold-blooded animals           | +   | -   |     |     |     | -   | -    | -   |
| 46  | 115713 | Chlamydomydia pneumoniae CWL029                |            |             |                |                                       | +   | -   |     |     |     | -   | -    | -   |
| 47  | 138677 | Chlamydomydia pneumoniae J138                  |            |             |                |                                       | +   | -   |     |     |     | -   | -    | -   |
| 48  | 182082 | Chlamydomydia pneumoniae TW183                 |            |             |                |                                       | +   | -   |     |     |     | -   | -    | -   |
| 49  | 194439 | Chlorobium tepidum TLS                         | org        | light       | HS, S          | aquatic environments                  | -   | -   | +   |     |     | -   | -    | -   |
| 50  | 243365 | Chromobacterium violaceum ATCC12472            | org        | org         | org            | soil, water, tropics                  | +   | -   | /   | +   |     | -   | -    | -   |
| 51  | 1488   | Clostridium acetobutylicum                     | (org)      |             |                | soil                                  | -   | -   | +   | +   |     | +   | -    | +   |
| 52  | 1502   | Clostridium perfringens                        | (org)      |             |                | soil, marine sediments                | +   | -   | +   | -   |     | +   | -    | +   |
| 53  | 212717 | Clostridium tetani E88                         | (org)      |             |                | human tissues                         | +   | -   | +   | +   |     | +   | -    | -   |
| 54  | 1717   | Corynebacterium diphtheriae                    | org        | org         | O              | humans, skin, respiratory tract       | +   | -   | -   | -   |     | -   | -    | +   |
| 55  | 196164 | Corynebacterium efficiens YS314                | org        | org         | O2             | mammalian skin, mucous membranes      | +   | -   | +   |     |     | -   | -    | +   |
| 56  | 196627 | Corynebacterium glutamicum ATCC13032           | org        | org         | O2             | mammalian skin, mucous membranes      | +   | -   | +   |     |     | -   | -    | +   |
| 57  | 227377 | Coxiella burnetii RSA493                       | org        | org         |                | ticks, animals                        | +   | -   |     |     |     | -   | -    | -   |
| 58  | 68909  | Deinococcus geothermalis                       |            |             |                | hot spring                            | -   | -   | -   |     | +   | -   | +    | +   |
| 59  | 1299   | Deinococcus radiodurans                        | org        | org         | O2             |                                       | -   | -   | +   | +   | +   | -   | +    | +   |
| 60  | 177439 | Desulfotalea psychrophila LSv54                | org, inorg | org, h      | SO4            | marine                                | -   | -   | +   | +   |     | -   | +    |     |
| 61  | 207559 | Desulfovibrio desulfuricans G20                |            |             | SO4            | soil                                  | -   | -   | +   | +   |     | -   | -    | -   |
| 62  | 882    | Desulfovibrio vulgaris                         | org, inorg | org, h      | inorg, metals  | soil                                  | -   | -   | +   | +   |     | -   | -    | -   |
| 63  | 891    | Desulfuromonas spp.                            |            |             |                | sulfur-rich marine                    | -   | -   | +   | +   |     | -   | -    | -   |
| 64  | 226185 | Enterococcus faecalis V583                     | org        | org         | ferm           | soil, mammalian GI tract              | +   | -   | +   |     |     | -   | -    | +   |
| 65  | 1352   | Enterococcus faecium                           | org        | org         | ferm           | human, water, soil                    | +   | -   | /   |     |     | -   | -    | +   |
| 66  | 218491 | Erwinia carotovora subsp. atroseptica SCRI1043 | org, inorg | org, inorg  |                | plant vascular system, potatoes       | -   | +   | +   | +   |     | -   | -    | -   |
| 67  | 199310 | Escherichia coli CFT073                        | org        | org         | ferm           | GI tract                              | +   | -   | +   | +   |     | -   | -    | -   |
| 68  | 83333  | Escherichia coli K12                           | org        | org         | ferm           | GI tract                              | +   | -   | +   | +   |     | -   | -    | -   |
| 69  | 155864 | Escherichia coli O157:H7 EDL933                | org        | org         | ferm           | GI tract                              | +   | -   | +   | +   |     | -   | -    | -   |
| 70  | 190304 | Fusobacterium nucleatum ATCC25586              | org        | org         | ferm           | GI, pulmonary tracts, oral infections | +   | -   | +   |     |     | -   | -    | -   |
| 71  | 28232  | Geobacter metallireducens                      | org        | org         | feiii          | subsurface environments               | -   | -   | +   | +   |     | -   | -    | -   |
| 72  | 243231 | Geobacter sulfurreducens PCA                   | org, inorg | org, inorg  | s, org, metals | subsurface environments               | -   | -   | +   | +   |     | -   | -    | -   |
| 73  | 33072  | Gloeobacter violaceus                          | CO2        | light       | O              | rock?                                 | -   | -   | -   |     |     | -   | -    | -   |
| 74  | 233412 | Haemophilus ducreyi 35000HP                    |            |             |                | human mucous membranes                | +   | -   | +   |     | +   | -   | -    | -   |
| 75  | 71421  | Haemophilus influenzae Rd KW20                 | org        | org         | ferm           | mammalian respiratory tract           | +   | -   | +   |     | +   | -   | -    | -   |

| No. | Tax ID | Species                                       | C src   | Electr. src | Electr. accep. | Habitat                                    | Ani | Pla | Ana | Mot | Com | Spo | Extr | Gm+ |
|-----|--------|-----------------------------------------------|---------|-------------|----------------|--------------------------------------------|-----|-----|-----|-----|-----|-----|------|-----|
| 76  | 272569 | Haloarcula marismortui ATCC43049              | org     | org         | O              | salt water                                 | -   | -   | -   | +   |     | -   | +    | -   |
| 77  | 64091  | Halobacterium sp. NRC1                        | org     | org         | NO3            | salt lakes                                 | -   | -   | +   | +   |     | -   | +    | -   |
| 78  | 235279 | Helicobacter hepaticus ATCC51449              | org     | org         | org            | mice, GIT, liver                           | +   | -   | -   | +   | +   | -   | -    | -   |
| 79  | 85962  | Helicobacter pylori str26695                  | org     | org, inorg  | O              | mammal, bird GI tracts                     | +   | -   | -   | +   | +   | -   | -    | -   |
| 80  | 85963  | Helicobacter pylori J99                       | org     | org, inorg  | O              | mammal, bird GI tracts                     | +   | -   | -   | +   | +   | -   | -    | -   |
| 81  | 257314 | Lactobacillus johnsonii NCC533                | org     | org         | ferm           | humans                                     | -   | -   | /   |     | +   | -   | -    | +   |
| 82  | 220668 | Lactobacillus plantarum WCFS1                 | org     | org         | ferm           | dairy products and environments            | -   | -   | +   |     | +   | -   | -    | +   |
| 83  | 1360   | Lactococcus lactis subsp. lactis              | org     | org         | ferm           | dairy products and environments            | -   | -   | +   | +   | +   | -   | -    | +   |
| 84  | 297245 | Legionella pneumophila str. Lens              |         |             | O              | soil, freshwater, biofilms                 | +   | -   | -   | /   | +   | -   | -    | -   |
| 85  | 297246 | Legionella pneumophila str. Paris             |         |             | O              | soil, freshwater, biofilms                 | +   | -   | -   | /   | +   | -   | -    | -   |
| 86  | 272624 | Legionella pneumophila str. Philadelphia1     | org     | org         | ferm           | soil, freshwater, biofilms                 | +   | -   | -   | /   | +   | -   | -    | -   |
| 87  | 281090 | Leifsonia xyli subsp. xyli str. CTCB07        | org     | org         | org            | xylem of sugarcane                         | -   | +   | -   | -   |     | -   | -    | +   |
| 88  | 267671 | Leptospira interrogans str. Fiocruz L1130     | org     | org         | O2             | water, animal renal tissue                 | +   | -   | -   | +   |     | -   | -    | -   |
| 89  | 189518 | Leptospira interrogans serovar lai str.56601  | org     | fatty acids |                | O                                          | -   | -   |     | -   | +   | -   | -    | -   |
| 90  | 1642   | Listeria innocua                              |         |             |                | soil?                                      | -   | -   | +   | +   | +   | -   | -    | +   |
| 91  | 169963 | Listeria monocytogenes EGDe                   | org     | org         |                | soil, decaying vegetable matter            | +   | -   | +   | +   | +   | -   | -    | +   |
| 92  | 265669 | Listeria monocytogenes str. 4b F2365          | org     | org         |                | soil, decaying vegetable matter            | +   | -   | +   | +   | +   | -   | -    | +   |
| 93  | 221988 | Mannheimia succiniciproducens MBEL55E         | org     | org         | org            | bovine rumen                               | -   | -   | +   | -   | -   | -   | -    | -   |
| 94  | 265311 | Mesoplasma florum L1                          |         |             |                | mammals, insects, plants                   | +   | +   | /   | -   |     | -   | -    | -   |
| 95  | 381    | Mesorhizobium loti                            | org     | org         | O2             | soil, plant root hairs                     | -   | +   |     | +   | +   | -   | -    | -   |
| 96  | 2190   | Methanocaldococcus jannaschii                 | CO2     | H2          | CO2            | salt marsh, marine sediments?              | -   | -   | +   | +   | +   | -   | +    | -   |
| 97  | 39152  | Methanococcus maripaludis                     | CO2     | H2          | CO2            | salt marsh                                 | -   | -   | +   | +   | +   | -   | +    | -   |
| 98  | 190192 | Methanopyrus kandleri AV19                    | inorg   | inorg H2    | S              | hydrothermal, volcanic vents               | -   | -   | +   | +   |     | -   | +    | -   |
| 99  | 188937 | Methanosarcina acetivorans C2A                | inorg   | org         | CO2            | natural waters, anaerobic sewage digestors | -   | -   | +   | +   |     | -   | +    | -   |
| 100 | 192952 | Methanosarcina mazei Goe1                     | inorg   | org         | CO2, H2        | deep sea hydrothermal vent                 | -   | -   | +   | +   |     | -   | +    | -   |
| 101 | 187420 | Methanothermobacter thermautotrophicus DeltaH | CO2     | H2          | CO2            | thermophilic,sewage                        | -   | -   | +   | -   |     | -   | +    | -   |
| 102 | 243233 | Methylococcus capsulatus str. Bath            | methane | methane     | O              | thermophilic                               | -   | -   | -   | -   |     | -   | +    | -   |
| 103 | 262316 | Mycobacterium avium k10                       | org     | org         | O              | mammals                                    | +   | -   | -   | -   | -   | -   | -    | /   |
| 104 | 233413 | Mycobacterium bovis AF212297                  | org     | org         | O              | humans, animals                            | +   | -   | -   | -   | -   | -   | -    | /   |
| 105 | 1769   | Mycobacterium leprae                          | org     | org         | O              | tissues of warm-blooded animals            | +   | -   | -   | -   | -   | -   | -    | /   |
| 106 | 83331  | Mycobacterium tuberculosis CDC1551            | org     | org         | nitrate?       | tissues of warm-blooded animals            | +   | -   | -   | -   | -   | -   | -    | /   |
| 107 | 83332  | Mycobacterium tuberculosis H37Rv              | org     | org         | nitrate?       | tissues of warm-blooded animals            | +   | -   | -   | -   | -   | -   | -    | /   |
| 108 | 233150 | Mycoplasma gallisepticum R                    | org     | org         |                | poultry                                    | +   | -   | /   | +   | -   | -   | -    | -   |
| 109 | 2097   | Mycoplasma genitalium                         | org     | org         |                | vertebrates                                | +   | -   | +   | -   | -   | -   | -    | -   |
| 110 | 295358 | Mycoplasma hyopneumoniae str232               | org     | org         |                | swine                                      | +   | -   | /   | -   | -   | -   | -    | -   |

| No. | Tax ID | Species                                                        | C src      | Electr. src       | Electr. accep. | Habitat                                            | Ani | Pla | Ana | Mot | Com | Spo | Extr | Gm+ |
|-----|--------|----------------------------------------------------------------|------------|-------------------|----------------|----------------------------------------------------|-----|-----|-----|-----|-----|-----|------|-----|
| 111 | 267748 | <i>Mycoplasma mobile</i> 163K                                  | org        | org               | ferm           | fish, humans, animals                              | +   | -   | /   | +   | -   | -   | -    | -   |
| 112 | 44101  | <i>Mycoplasma mycoides</i> subsp. <i>mycoides</i> SC           | org        | org               | org            | cattle                                             | +   | -   | /   | -   | -   | -   | -    | -   |
| 113 | 28227  | <i>Mycoplasma penetrans</i>                                    | org        | org               |                | vertebrates                                        | +   | -   | +   | -   | -   | -   | -    | -   |
| 114 | 2104   | <i>Mycoplasma pneumoniae</i>                                   | org        | org               |                | vertebrates                                        | +   | -   | +   |     | -   | -   | -    | -   |
| 115 | 2107   | <i>Mycoplasma pulmonis</i>                                     | org        | org               |                | vertebrates                                        | +   | -   | +   | +   | -   | -   | -    | -   |
| 116 | 228908 | <i>Nanoarchaeum equitans</i> Kin4M                             | org        | org               | org            | hyperthermophilic, symbiont with <i>Ignicoccus</i> | -   | -   | +   |     |     | -   | +    | -   |
| 117 | 122586 | <i>Neisseria meningitidis</i> MC58                             | (org)      |                   |                | (cerebrospinal fluid)                              | +   | -   | -   | -   | +   | -   | -    | -   |
| 118 | 122587 | <i>Neisseria meningitidis</i> Z2491                            | (org)      |                   |                | (cerebrospinal fluid)                              | +   | -   | -   | -   | +   | -   | -    | -   |
| 119 | 228410 | <i>Nitrosomonas europaea</i> ATCC19718                         | inorg      | inorg             | O2             | fresh or sea water, soils                          | -   | -   | -   | +   |     | -   | -    | -   |
| 120 | 37329  | <i>Nocardia farcinica</i>                                      |            |                   | O              | soil, humans, animals                              | +   | -   | -   | -   |     | -   | -    | -   |
| 121 | 63737  | <i>Nostoc punctiforme</i>                                      | org        | org               | N?             | freshwater                                         | -   | -   | -   | +   | +   | -   | +    | -   |
| 122 | 103690 | <i>Nostoc</i> sp. PCC7120                                      |            |                   |                |                                                    | -   | -   | +   | +   | +   | -   | +    | -   |
| 123 | 182710 | <i>Oceanobacillus iheyensis</i>                                |            |                   |                | deep-sea sediment                                  | -   | -   | -   | +   | +   | +   | -    | +   |
| 124 | 100379 | Onion yellows phytoplasma                                      |            |                   |                | phloem of plants                                   | -   | +   | -   |     |     | -   | -    | -   |
| 125 | 264201 | <i>Parachlamydia</i> sp. UWE25                                 | org        | org               |                | amoebae                                            | -   | -   | m   |     |     | -   | -    | -   |
| 126 | 747    | <i>Pasteurella multocida</i>                                   | org        | org               | O              | nasopharynx, gingiva                               | +   | -   | +   | -   | -   | -   | -    | -   |
| 127 | 298386 | <i>Photobacterium profundum</i> SS9                            |            |                   |                | moderately deep sea                                | -   | -   | /   | +   | +   | -   | -    | -   |
| 128 | 243265 | <i>Photobacterium luminescens</i> subsp. <i>laumondii</i> TTO1 | org        |                   | ferm           | soil nematodes, insects                            | +   | -   | +   | +   |     | -   | -    | -   |
| 129 | 263820 | <i>Picrophilus torridus</i> DSM9790                            | org        | org               | org            | thermoacidophilic                                  | -   | -   | -   | -   |     | -   | +    | -   |
| 130 | 243090 | <i>Pirellula</i> sp.1                                          | org        | org               | org            | marine                                             | -   | -   | -   | /   | -   | -   | -    | -   |
| 131 | 52972  | <i>Polaromonas</i>                                             | inorg      | org               | O              | coal tar contaminated freshwater sediment          | -   | -   | -   | -   |     | -   | -    | -   |
| 132 | 242619 | <i>Porphyromonas gingivalis</i> W83                            | org        | org               | ferm, org      | human oral cavities                                | +   | -   | +   |     |     | -   | -    | -   |
| 133 | 74547  | <i>Prochlorococcus marinus</i> str. MIT9313                    | org, inorg | light, org        | org, inorg     | marine                                             | -   | -   | -   | -   |     | -   | -    | -   |
| 134 | 167539 | <i>Prochlorococcus marinus</i> CCMP1375                        | org, inorg | light             | org, inorg     | marine                                             | -   | -   | -   | -   |     | -   | -    | -   |
| 135 | 59919  | <i>Prochlorococcus marinus</i> CCMP1986                        | org, inorg | light             | org, inorg     | marine                                             | -   | -   | -   | -   |     | -   | -    | -   |
| 136 | 267747 | <i>Propionibacterium acnes</i> KPA171202                       | org, inorg | org               | ferm, inorg    | human skin                                         | -   | -   | m   | -   |     | -   | -    | -   |
| 137 | 208964 | <i>Pseudomonas aeruginosa</i> PAO1                             | org        | org               | O2             | moist or wet environments                          | +   | -   |     | +   | +   | -   | -    | -   |
| 138 | 160488 | <i>Pseudomonas putida</i> KT2440                               | org        | org               | O2             | wet soil, plants                                   | -   | -   | -   | +   | +   | -   | -    | -   |
| 139 | 223283 | <i>Pseudomonas syringae</i> DC3000                             | org        | org               | org            | wet soil, plants                                   | -   | +   | -   | +   | +   | -   | -    | -   |
| 140 | 13773  | <i>Pyrobaculum aerophilum</i>                                  | org, inorg | org, inorg        | org, inorg     | hyperthermophilic                                  | -   | -   | m   | +   |     | -   | +    | -   |
| 141 | 29292  | <i>Pyrococcus abyssi</i>                                       | org        | org               | inorg s        | deep sea hydrothermal vent                         | -   | -   | +   | +   |     | -   | +    | -   |
| 142 | 186497 | <i>Pyrococcus furiosus</i> DSM3638                             | org        | org               | s              | deep sea hydrothermal vent                         | -   | -   | +   | +   |     | -   | +    | -   |
| 143 | 53953  | <i>Pyrococcus horikoshii</i>                                   | org        | org               | inorg s        | deep sea hydrothermal vent                         | -   | -   | +   | +   |     | -   | +    | -   |
| 144 | 305    | <i>Ralstonia solanacearum</i>                                  | org        | org               | O2, NO3        | water, soil, plants                                | -   | +   | -   | +   | +   | -   | -    | -   |
| 145 | 258594 | <i>Rhodopseudomonas palustris</i> CGA009                       | org, inorg | light, org, inorg | org, inorg     | swine waste, earthworm droppings, water            | -   | -   | /   | +   |     | -   | -    | -   |
| 146 | 781    | <i>Rickettsia conorii</i>                                      | org        | org               |                | arthropod, vertebrate hosts                        | +   | +   | +   |     | -   | -   | -    | -   |
| 147 | 782    | <i>Rickettsia prowazekii</i>                                   | org        | org               |                | arthropod, vertebrate hosts                        | +   | -   | +   |     | -   | -   | -    | -   |



| No. | Tax ID | Species                                     | C src      | Electr. src | Electr. accep. | Habitat                                         | Ani | Pla | Ana | Mot | Com | Spo | Extr | Gm+ |
|-----|--------|---------------------------------------------|------------|-------------|----------------|-------------------------------------------------|-----|-----|-----|-----|-----|-----|------|-----|
| 148 | 257363 | Rickettsia typhi str. wilmington            |            |             |                | ticks, vertebrates and invertebrates            | +   | -   | -   | -   |     | -   | -    | -   |
| 149 | 90370  | Salmonella enterica sv. Typhi               | org        | org         | ferm           | GI tract                                        | +   | -   | +   | +   | -   | -   | -    | -   |
| 150 | 209261 | Salmonella enterica sv. Typhi Ty2           | org        | org         | ferm           | human                                           | +   | -   | +   | +   | -   | -   | -    | -   |
| 151 | 99287  | Salmonella typhimurium LT2                  | org        | org         | ferm           | GI tract                                        | +   | -   | +   | +   | -   | -   | -    | -   |
| 152 | 211586 | Shewanella oneidensis MR1                   |            |             | various        | soil                                            | -   | -   | +   | +   |     | -   | -    | -   |
| 153 | 198215 | Shigella flexneri 2a str.2457T              | org        | org         | ferm           | GI tract                                        | +   | -   | +   | -   |     | -   | -    | -   |
| 154 | 198214 | Shigella flexneri 2a str.301                | org        |             |                |                                                 | +   | -   |     | -   |     | -   | -    | -   |
| 155 | 292414 | Silicibacter TM1040                         | org        | org         |                |                                                 | -   | -   | +   |     |     | -   | -    | -   |
| 156 | 382    | Sinorhizobium meliloti                      | org        | org         | O2             | soil, plant root hairs                          | -   | +   | -   | +   |     | -   | -    | -   |
| 157 | 282458 | Staphylococcus aureus subsp. aureus MRSA252 |            |             |                | skin of warm-blooded animals                    | +   | -   |     | -   | +   | -   | -    | +   |
| 158 | 282459 | Staphylococcus aureus subsp. aureus MSSA476 |            |             |                | skin of warm-blooded animals                    | +   | -   |     | -   | +   | -   | -    | +   |
| 159 | 158878 | Staphylococcus aureus subsp. aureus Mu50    |            |             |                | skin of warm-blooded animals                    | +   | -   |     | -   | +   | -   | -    | +   |
| 160 | 196620 | Staphylococcus aureus subsp. aureus MW2     |            |             |                | skin of warm-blooded animals                    | +   | -   |     | -   | +   | -   | -    | +   |
| 161 | 158879 | Staphylococcus aureus subsp. aureus N315    |            |             |                | skin of warm-blooded animals                    | +   | -   |     | -   | +   | -   | -    | +   |
| 162 | 176280 | Staphylococcus epidermidis ATCC12228        |            |             |                | skin & mucous membranes of warm-blooded animals | +   | -   | -   | -   | +   | -   | -    | +   |
| 163 | 208435 | Streptococcus agalactiae 2603VR             |            |             |                | human tissues                                   | +   | -   | +   | -   | +   | -   | -    | +   |
| 164 | 211110 | Streptococcus agalactiae NEM316             |            |             |                | human tissues                                   | +   | -   | +   | -   | +   | -   | -    | +   |
| 165 | 210007 | Streptococcus mutans UA159                  | org        | org         | ferm           | human tissues                                   | +   | -   | +   | -   | +   | -   | -    | +   |
| 166 | 171101 | Streptococcus pneumoniae R6                 | org        | org         | ferm           | human tissues                                   | +   | -   | +   | -   | +   | -   | -    | +   |
| 167 | 170187 | Streptococcus pneumoniae TIGR4              | org        | org         | ferm           | human tissues                                   | +   | -   | +   | -   | +   | -   | -    | +   |
| 168 | 160490 | Streptococcus pyogenes M1 GAS               |            |             |                | human tissues                                   | +   | -   | +   | -   | +   | -   | -    | +   |
| 169 | 286636 | Streptococcus pyogenes MGAS10394            |            |             |                | human tissues                                   | +   | -   | +   | -   | +   | -   | -    | +   |
| 170 | 198466 | Streptococcus pyogenes MGAS315              |            |             |                | human tissues                                   | +   | -   | +   | -   | +   | -   | -    | +   |
| 171 | 186103 | Streptococcus pyogenes MGAS8232             |            |             |                | human tissues                                   | +   | -   | +   | -   | +   | -   | -    | +   |
| 172 | 193567 | Streptococcus pyogenes SS11                 |            |             |                | human tissues                                   | +   | -   | +   | -   | +   | -   | -    | +   |
| 173 | 286604 | Streptococcus suis                          | org        | org         | org, N, S      | pigs, humans                                    | +   | -   | /   | -   | +   | -   | -    | +   |
| 174 | 227882 | Streptomyces avermitilis MA4680             | org        | org         | O2             | soil, water                                     | -   | -   | -   | -   | +   | -   | -    | +   |
| 175 | 2287   | Sulfolobus solfataricus                     | inorg      | inorg (S)   |                | acidic mines, hot springs                       | -   | -   | +   | +   |     | -   | +    | -   |
| 176 | 111955 | Sulfolobus tokodaii                         | inorg      | inorg (S)   |                | acidic mines, hot springs                       | -   | -   | +   | +   |     | -   | +    | -   |
| 177 | 292459 | Symbiobacterium thermophilum IAM14863       | org        | org         | org, N         | compost                                         | -   | -   | /   | +   |     | +   | +    | -   |
| 178 | 84588  | Synechococcus sp. WH8102                    | org, inorg | org, inorg  | org, inorg     | marine                                          | -   | -   | +   | +   |     | -   | +    | -   |
| 179 | 119072 | Thermoanaerobacter tengcongensis            |            |             | ferm           | deep sea hydrothermal vent                      | -   | -   | +   | +   | +   | +   | +    | +   |
| 180 | 2303   | Thermoplasma acidophilum                    | org        | inorg       | O              | self-heating coal refuse piles                  | -   | -   | -   | +   | +   | -   | +    | -   |
| 181 | 50339  | Thermoplasma volcanium                      | org        | inorg       |                | continental & submarine solfataras              | -   | -   | +   | +   | +   | -   | +    | -   |

| No.   | Tax ID | Species                                            | C src         | Electr. src   | Electr. accep. | Habitat                                        | Ani | Pla | Ana | Mot | Com | Spo | Extr | Gm+ |
|-------|--------|----------------------------------------------------|---------------|---------------|----------------|------------------------------------------------|-----|-----|-----|-----|-----|-----|------|-----|
| 182   | 197221 | <i>Thermosynechococcus elongatus</i> BP1           |               |               |                |                                                | -   | -   | +   | +   |     | -   | +    | -   |
| 183   | 2336   | <i>Thermotoga maritima</i>                         | org           | inorg         | s2o3           | geothermal heated seafloor                     | -   | -   | +   | +   |     | -   | +    | -   |
| 184   | 262724 | <i>Thermus thermophilus</i> HB27                   | org           | org           | org            | aquatic thermal                                | -   | -   | -   | +   | +   | -   | +    | /   |
| 185   | 292415 | <i>Thiobacillus denitrificans</i>                  | inorg         | inorg         | inorg          | water and soil                                 | -   | -   | /   | +   | +   | -   | -    | -   |
| 186   | 243275 | <i>Treponema denticola</i> ATCC35405               | org           | org           | ferm           | human oral cavities                            | +   | -   | +   | +   |     | -   | -    | -   |
| 187   | 160    | <i>Treponema pallidum</i>                          | org           | org           | ferm           | human                                          | +   | -   | +   | +   |     | -   | -    | -   |
| 188   | 203267 | <i>Tropheryma whipplei</i> str. Twist              | org           | org           | O2             | soil, GI tract                                 | +   | -   | +   | -   |     | -   | -    | -   |
| 189   | 218496 | <i>Tropheryma whipplei</i> TW0827                  |               |               |                |                                                | +   | -   |     | -   |     | -   | -    | -   |
| 190   | 2130   | <i>Ureaplasma urealyticum</i>                      | org           | org           |                | vertebrates                                    | +   | -   | +   | -   |     | -   | -    | -   |
| 191   | 666    | <i>Vibrio cholerae</i>                             | org           | org           | ferm           | aquatic                                        | +   | -   | +   | +   | +   | -   | -    | -   |
| 192   | 223926 | <i>Vibrio parahaemolyticus</i> RIMD2210633         | org           | org           | ferm           | marine                                         | +   | -   | +   | +   | +   | -   | -    | -   |
| 193   | 216895 | <i>Vibrio vulnificus</i> CMCP6                     | org           | org           | ferm           | marine, wounds                                 | +   | -   | +   | +   | +   | -   | -    | -   |
| 194   | 196600 | <i>Vibrio vulnificus</i> YJ016                     | org           |               |                |                                                | +   | -   | /   | +   | +   | -   | -    | -   |
| 195   | 36870  | <i>Wigglesworthia glossinidia</i>                  | org           | org           |                | arthropod endosymbiont                         | +   | -   | +   | -   | -   | -   | -    | -   |
| 196   | 163164 | <i>Wolbachia</i> sp.                               | org,<br>inorg | org,<br>inorg | org            | endosymbiont of <i>Drosophila melanogaster</i> | -   | -   | -   | -   | +   | -   | -    | -   |
| 197   | 844    | <i>Wolinella succinogenes</i>                      | org           | inorg,<br>org | org            | humans, animals                                | -   | -   | +   | +   |     | -   | -    | -   |
| 198   | 190486 | <i>Xanthomonas axonopodis</i> str.306              |               |               | O              | citrus plants                                  | -   | +   | -   | +   | +   | -   | -    | -   |
| 199   | 190485 | <i>Xanthomonas campestris</i> ATCC33913            | org           | org           | O2             | plant vascular system                          | -   | +   | -   | +   | +   | -   | -    | -   |
| 200   | 160492 | <i>Xylella fastidiosa</i> 9a5c                     |               |               |                | plant xylem, insect                            | -   | +   | -   | -   |     | -   | -    | -   |
| 201   | 155920 | <i>Xylella fastidiosa</i> ANN1 (oleander)          |               |               |                | Oleander bushes                                | -   | +   | -   | -   |     | -   | -    | -   |
| 202   | 155919 | <i>Xylella fastidiosa</i> DIXON (almond)           |               |               |                | Almond trees                                   | -   | +   | -   | -   |     | -   | -    | -   |
| 203   | 183190 | <i>Xylella fastidiosa</i> Temecula1                |               |               |                | plant xylem, insect                            | -   | +   | -   | -   |     | -   | -    | -   |
| 204   | 229193 | <i>Yersinia pestis</i> biovar Medievalis str.91001 | org           | org           | ferm           | fleas, mammals                                 | +   | -   | +   | +   | +   | -   | -    | -   |
| 205   | 214092 | <i>Yersinia pestis</i> CO92                        | org           | org           | ferm           | fleas, mammals                                 | +   | -   | +   | +   | +   | -   | -    | -   |
| 206   | 187410 | <i>Yersinia pestis</i> KIM                         | org           | org           | ferm           | fleas, mammals                                 | +   | -   | +   | +   | +   | -   | -    | -   |
| 207   | 273123 | <i>Yersinia pseudotuberculosis</i> IP32953         | org           | org           | ferm           | animals, humans                                | +   | -   | +   | +   | +   | -   | -    | -   |
| Total |        |                                                    |               |               |                |                                                | 117 | 17  | 97  | 101 | 85  | 18  | 33   | 47  |

Table S2. Chemotaxis genes

| Module No. | Cluster No. | Gene | Gene ID | Genbank ID | VIMSS ID | COG | mpi  | Function                                                                                 | Engineering Ontology      |
|------------|-------------|------|---------|------------|----------|-----|------|------------------------------------------------------------------------------------------|---------------------------|
| E          | 1           | abrB | Bsu0037 | 16077105   | 36570    | K   | 63.3 | transcriptional regulator                                                                | crosstalk                 |
| E          | 1           | codY | Bsu1618 | 16078680   | 38152    | K   | 55.4 | transcriptional repressor of flagellar gene expression                                   | crosstalk                 |
| E          | 1           | fliT | Bsu3529 | 16080585   | 40071    | -   | 54.0 | flagellar protein; putative chaperone                                                    | actuator                  |
| E          | 1           | fliY | Bsu1633 | 16078695   | 38168    | N   | 26.9 | flagellar motor switch protein; CheY~P hydrolyzing protein                               | actuator                  |
| E          | 1           | fliZ | Bsu1635 | 16078697   | 38170    | N   | 30.8 | required for flagellar formation                                                         | unknown                   |
| E          | 1           | hpr  | Bsu0999 | 16078063   | 37532    | K   | 66.2 | transcriptional regulator                                                                | crosstalk                 |
| E          | 1           | sinI | Bsu2458 | 16079516   | 38997    | -   | 45.5 | antagonist of SinR                                                                       | crosstalk                 |
| E          | 1           | sinR | Bsu2459 | 16079517   | 38998    | K   | 68.7 | transcriptional regulator                                                                | crosstalk                 |
| E          | 1           | tgl  | Bsu3122 | 16080179   | 39663    | -   | 36.7 | transglutaminase                                                                         | unknown                   |
| B          | 2           | cheA | Bsu1644 | 16078706   | 38179    | N   | 29.9 | two-component sensor histidine kinase                                                    | enzymatic regulator       |
| B          | 2           | cheB | Bsu1643 | 16078705   | 38178    | N   | 39.0 | glutamate methylesterase                                                                 | regulator                 |
| B          | 2           | cheR | Bsu2271 | 16079329   | 38809    | N   | 27.9 | methyltransferase                                                                        | regulator                 |
| B          | 2           | cheW | Bsu1645 | 16078707   | 38180    | N   | 23.4 | coupling of receptor to kinase                                                           | regulator                 |
| B          | 2           | cheY | Bsu1634 | 16078696   | 38169    | T   | 35.8 | two-component response regulator                                                         | regulator                 |
| B          | 2           | yoaH | Bsu1860 | 16078921   | 38397    | N   | 17.8 | similar to methyl-accepting chemotaxis protein; possible function in membrane attachment | sensor                    |
| B          | 2           | yvaQ | Bsu3366 | 16080422   | 39908    | N   | 17.9 | similar to transmembrane receptor taxis protein                                          | sensor                    |
| -          | 3           | crh  | Bsu3471 | 16080527   | 40013    | G   | 32.9 | catabolite repression HPr-like protein                                                   | regulator                 |
| -          | 3           | ptsH | Bsu1392 | 16078454   | 37925    | G   | 32.2 | histidine-containing phosphocarrier protein; PTS system                                  | regulator                 |
| -          | 4           | cheC | Bsu1646 | 16078708   | 38181    | N   | 20.3 | required for correct methylation of McpB; adaptation                                     | regulator                 |
| -          | 4           | cheD | Bsu1647 | 16078709   | 38182    | N   | 29.6 | required for basal activation of CheA kinase                                             | regulator                 |
| -          | 4           | cheV | Bsu1403 | 16078465   | 37936    | T   | 25.5 | enzymatic regulator; promotes kinase activation; adaptation                              | regulator                 |
| -          | 4           | flgM | Bsu3540 | 16080596   | 40082    | K   | 23.9 | anti-sigma factor repressor of sigma-D-dependent transcription                           | actuator                  |
| -          | 4           | ylxH | Bsu1642 | 16078704   | 38177    | D   | 31.0 | similar to flagellar biosynthesis switch protein                                         | unknown                   |
| A          | 5           | flgB | Bsu1619 | 16078681   | 38153    | N   | 23.5 | flagellar basal-body rod protein                                                         | actuator                  |
| A          | 5           | flgC | Bsu1620 | 16078682   | 38154    | N   | 37.5 | flagellar basal-body rod protein                                                         | actuator                  |
| A          | 5           | flgE | Bsu1630 | 16078692   | 38164    | N   | 45.4 | flagellar hook protein                                                                   | actuator                  |
| A          | 5           | flgK | Bsu3538 | 16080594   | 40080    | N   | 18.9 | flagellar hook-associated protein 1 (HAP1)                                               | actuator                  |
| A          | 5           | flgL | Bsu3537 | 16080593   | 40079    | N   | 19.9 | flagellar hook-associated protein 3 (HAP3)                                               | actuator                  |
| A          | 5           | flhA | Bsu1640 | 16078702   | 38175    | N   | 36.3 | flagella-associated protein                                                              | actuator                  |
| A          | 5           | flhB | Bsu1639 | 16078701   | 38174    | N   | 30.2 | flagella-associated protein                                                              | actuator                  |
| A          | 5           | flhO | Bsu3638 | 16080693   | 40180    | N   | 43.8 | flagellar basal-body rod protein                                                         | actuator                  |
| A          | 5           | flhP | Bsu3637 | 16080692   | 40179    | N   | 41.2 | flagellar hook-basal body protein                                                        | actuator                  |
| A          | 5           | fliD | Bsu3531 | 16080587   | 40073    | N   | 17.7 | flagellar hook-associated protein 2 (HAP2)                                               | actuator                  |
| A          | 5           | fliE | Bsu1621 | 16078683   | 38155    | N   | 24.8 | flagellar hook-basal body protein; rod protein                                           | actuator                  |
| A          | 5           | fliF | Bsu1622 | 16078684   | 38156    | N   | 21.2 | flagellar basal-body M-ring protein                                                      | actuator                  |
| A          | 5           | fliG | Bsu1623 | 16078685   | 38157    | N   | 32.0 | flagellar motor switch protein; C-ring protein                                           | actuator                  |
| A          | 5           | fliI | Bsu1625 | 16078687   | 38159    | N   | 44.1 | flagellar-specific ATP synthase; delivery complex                                        | actuator                  |
| A          | 5           | fliM | Bsu1632 | 16078694   | 38167    | N   | 24.1 | flagellar motor switch protein; C-ring protein                                           | actuator                  |
| A          | 5           | fliP | Bsu1636 | 16078698   | 38171    | N   | 41.5 | flagellar protein; C-rod protein                                                         | actuator                  |
| A          | 5           | fliQ | Bsu1637 | 16078699   | 38172    | N   | 34.5 | flagellar protein; C-rod protein                                                         | actuator                  |
| A          | 5           | fliR | Bsu1638 | 16078700   | 38173    | N   | 22.0 | flagellar protein; C-rod protein                                                         | actuator                  |
| A          | 5           | fliS | Bsu3530 | 16080586   | 40072    | O   | 27.3 | flagellar protein; putative chaperone                                                    | actuator                  |
| A          | 5           | hag  | Bsu3533 | 16080589   | 40075    | N   | 33.9 | flagellin protein                                                                        | actuator                  |
| A          | 5           | motA | Bsu1371 | 16078433   | 37904    | N   | 27.3 | motility protein A; proton conductor                                                     | actuator                  |
| A          | 5           | motB | Bsu1370 | 16078432   | 37903    | N   | 21.2 | motility protein B; anchor to the peptidoglycan                                          | actuator                  |
| A          | 5           | ylqH | Bsu1609 | 16078671   | 38143    | S   | 29.5 | similar to flagellar biosynthetic protein                                                | unknown                   |
| A          | 5           | ylxG | Bsu1629 | 16078691   | 38163    | N   | 21.4 | similar to flagellar hook assembly protein                                               | unknown                   |
| -          | 6           | flhF | Bsu1641 | 16078703   | 38176    | N   | 21.9 | GTP-binding signal recognition particle                                                  | actuator                  |
| -          | 6           | sigD | Bsu1648 | 16078710   | 38183    | K   | 33.5 | RNA polymerase sigma-28 factor (sigma-D)                                                 | transcriptional regulator |
| -          | 6           | yhfV | Bsu1038 | 16078102   | 37571    | -   | 10.3 | similar to methyl-accepting chemotaxis protein                                           | sensor                    |
| D          | 7           | fliH | Bsu1624 | 16078686   | 38158    | N   | 15.3 | flagellar assembly protein; delivery complex                                             | actuator                  |
| D          | 7           | fliJ | Bsu1626 | 16078688   | 38160    | N   | 18.9 | flagellar protein; delivery complex chaperone                                            | actuator                  |
| D          | 7           | fliK | Bsu1628 | 16078690   | 38162    | N   | 11.8 | flagellar protein; hook length                                                           | actuator                  |
| D          | 7           | fliL | Bsu1631 | 16078693   | 38166    | N   | 19.9 | flagellar protein                                                                        | actuator                  |
| C          | 8           | mcpA | Bsu3119 | 16080176   | 39660    | N   | 18.7 | glucose, alpha-methyl glucoside receptor                                                 | sensor                    |
| C          | 8           | mcpB | Bsu3121 | 16080178   | 39662    | N   | 18.8 | Asn Asp Gln Glu His receptor                                                             | sensor                    |



Table S3. Sporulation genes

| Module No. | Cluster No. | Gene    | Gene ID | Genbank ID | VIMSS ID | COG | mpi  | $K_a/K_s$ | Function                                                                                             | Engineering Ontology      |
|------------|-------------|---------|---------|------------|----------|-----|------|-----------|------------------------------------------------------------------------------------------------------|---------------------------|
| A          | 1           | cotJB   | Bsu0690 | 16077757   | 37223    | -   | 52.1 | 0.04      | cotJB                                                                                                | actuator                  |
| A          | 1           | cotJC   | Bsu0691 | 16077758   | 37224    | P   | 60.9 | 0.14      | component of spore undercoat                                                                         | actuator                  |
| A          | 1           | cotS    | Bsu3085 | 16080142   | 39626    | -   | 19.2 | 0.00      | spore coat protein                                                                                   | actuator                  |
| A          | 1           | gerAA   | Bsu3302 | 16080358   | 39844    | -   | 40.7 | 0.00      | germination response to L-alanine and related amino acids (earliest stage)                           | sensor                    |
| A          | 1           | gerAC   | Bsu3304 | 16080360   | 39846    | -   | 21.6 | 0.66      | germination response to L-alanine and related amino acids (earliest stage)                           | sensor                    |
| A          | 1           | gerBA   | Bsu3578 | 16080633   | 40120    | -   | 40.8 | 0.00      | germination response to the combination of glucose; fructose; L-asparagine; and KCl (earliest stage) | sensor                    |
| A          | 1           | gerBC   | Bsu3580 | 16080635   | 40122    | -   | 21.7 | 0.00      | germination response to the combination of glucose; fructose; L-asparagine; and KCl (earliest stage) | sensor                    |
| A          | 1           | gerKA   | Bsu0371 | 16077438   | 36904    | -   | 40.7 | 0.00      | germination response to the combination of glucose; fructose; L-asparagine; and KCl                  | actuator                  |
| A          | 1           | gerKB   | Bsu0373 | 16077440   | 36906    | -   | 17.9 | 0.54      | germination response to the combination of glucose; fructose; L-asparagine; and KCl                  | actuator                  |
| A          | 1           | gerKC   | Bsu0372 | 16077439   | 36905    | -   | 20.6 | 0.47      | germination response to the combination of glucose; fructose; L-asparagine; and KCl                  | actuator                  |
| A          | 1           | gpr     | Bsu2550 | 16079608   | 39090    | -   | 59.1 | 0.19      | spore protease                                                                                       | transcriptional regulator |
| A          | 1           | sapB    | Bsu0666 | 16077733   | 37199    | S   | 28.0 | 0.37      | mutant activates alkaline phosphatase during sporulation independently of sigma-F and sigma-E        | unknown                   |
| A          | 1           | sleB    | Bsu2292 | 16079350   | 38830    | M   | 59.5 | 0.10      | spore cortex-lytic enzyme                                                                            | enzymatic regulator       |
| A          | 1           | splB    | Bsu1395 | 16078457   | 37928    | L   | 70.8 | 0.26      | spore photoproduct lyase                                                                             | enzymatic regulator       |
| A          | 1           | spmA    | Bsu2317 | 16079375   | 38855    | R   | 53.8 | 0.17      | spore maturation protein                                                                             | actuator                  |
| A          | 1           | spmB    | Bsu2316 | 16079374   | 38854    | S   | 44.3 | 0.26      | spore maturation protein                                                                             | actuator                  |
| A          | 1           | spolIAA | Bsu2346 | 16079404   | 38885    | T   | 22.8 | 0.31      | anti-anti-sigma factor (antagonist of SpoIIAB)                                                       | transcriptional regulator |
| A          | 1           | spolIAB | Bsu2345 | 16079403   | 38884    | T   | 63.3 | 0.19      | anti-sigma factor (antagonist of sigma-F) and serine kinase                                          | transcriptional regulator |
| A          | 1           | spolIID | Bsu3673 | 16080728   | 40215    | D   | 25.7 | 0.33      | transcribed in mother cell; mutants block septal thinning                                            | transcriptional regulator |
| A          | 1           | spolIE  | Bsu0064 | 16077132   | 36597    | T   | 52.3 | 0.38      | serine phosphatase; required for polar FtsZ ring formation                                           | enzymatic regulator       |
| A          | 1           | spolIGA | Bsu1533 | 16078595   | 38066    | -   | 31.4 | 0.53      | protease; converts pro-SigE to SigE                                                                  | actuator                  |

| Module No. | Cluster No. | Gene     | Gene ID | Genbank ID | VIMSS ID | COG | mpi  | $K_a/K_s$ | Function                                                                                                       | Engineering Ontology      |
|------------|-------------|----------|---------|------------|----------|-----|------|-----------|----------------------------------------------------------------------------------------------------------------|---------------------------|
| A          | 1           | spolIIAA | Bsu2441 | 16079499   | 38980    | S   | 33.6 | 0.24      | mutants block sporulation after engulfment                                                                     | transcriptional regulator |
| A          | 1           | spolIIAB | Bsu2440 | 16079498   | 38979    | -   | 36.5 | 0.24      | mutants block sporulation after engulfment                                                                     | actuator                  |
| A          | 1           | spolIIAC | Bsu2439 | 16079497   | 38978    | -   | 55.2 | 0.22      | mutants block sporulation after engulfment                                                                     | actuator                  |
| A          | 1           | spolIIAD | Bsu2438 | 16079496   | 38977    | -   | 48.0 | 0.30      | mutants block sporulation after engulfment                                                                     | actuator                  |
| A          | 1           | spolIIAE | Bsu2437 | 16079495   | 38976    | -   | 40.6 | 0.28      | mutants block sporulation after engulfment                                                                     | actuator                  |
| A          | 1           | spolIIAF | Bsu2436 | 16079494   | 38975    | -   | 30.9 | 0.35      | mutants block sporulation after engulfment                                                                     | actuator                  |
| A          | 1           | spolIIAG | Bsu2435 | 16079493   | 38974    | -   | 35.4 | 0.42      | mutants block sporulation after engulfment                                                                     | actuator                  |
| A          | 1           | spolIID  | Bsu3640 | 16080695   | 40182    | -   | 73.4 | 0.09      | transcriptional regulator                                                                                      | transcriptional regulator |
| A          | 1           | spolIIM  | Bsu2352 | 16079410   | 38891    | S   | 32.5 | 0.64      | mutants do not complete septal thinning                                                                        | actuator                  |
| A          | 1           | spolIP   | Bsu2549 | 16079607   | 39089    | -   | 40.8 | 0.39      | spolIP                                                                                                         | actuator                  |
| A          | 1           | spolIR   | Bsu3695 | 16080750   | 40237    | -   | 45.2 | 0.39      | alternate gene name: ipc-27d csfX                                                                              | actuator                  |
| A          | 1           | spolVA   | Bsu2279 | 16079337   | 38817    | -   | 67.0 | 0.16      | alternate gene name: spoVP                                                                                     | transcriptional regulator |
| A          | 1           | spolVB   | Bsu2421 | 16079479   | 38960    | M   | 48.9 | 0.22      | serine peptidase synthesized in the spore chamber which self-cleaves to regulate sigma <sub>k</sub> checkpoint | transcriptional regulator |
| A          | 1           | spolVFB  | Bsu2793 | 16079849   | 39333    | R   | 31.4 | 0.35      | membrane metalloprotease governing intercompartmental communication                                            | actuator                  |
| A          | 1           | spoVAC   | Bsu2341 | 16079399   | 38880    | -   | 50.7 | 0.30      | mutants lead to the production of immature spores (stage V sporulation)                                        | actuator                  |
| A          | 1           | spoVAD   | Bsu2340 | 16079398   | 38879    | -   | 48.5 | 0.24      | mutants lead to the production of immature spores (stage V sporulation)                                        | actuator                  |
| A          | 1           | spoVAF   | Bsu2338 | 16079396   | 38877    | -   | 41.3 | 0.26      | mutants lead to the production of immature spores (stage V sporulation)                                        | actuator                  |
| A          | 1           | spoVG    | Bsu0049 | 16077117   | 36582    | M   | 56.2 | 0.13      | required for spore cortex synthesis                                                                            | actuator                  |
| A          | 1           | spoVID   | Bsu2807 | 16079863   | 39347    | -   | 8.8  | 0.00      | guides safA to spore surface; morphogen                                                                        | transcriptional regulator |
| A          | 1           | spoVK    | Bsu1743 | 16078805   | 38279    | O   | 57.0 | 0.00      | alternate gene name: spoVJ~disruption leads to the production of immature spores (stage V sporulation)         | transcriptional regulator |



| Module No. | Cluster No. | Gene  | Gene ID | Genbank ID | VIMSS ID | COG | mpi  | $K_a/K_s$ | Function                                                                                                         | Engineering Ontology      |
|------------|-------------|-------|---------|------------|----------|-----|------|-----------|------------------------------------------------------------------------------------------------------------------|---------------------------|
| A          | 1           | spoVS | Bsu1699 | 16078761   | 38234    | S   | 86.9 | 0.06      | required for dehydration of the spore core and assembly of the coat                                              | actuator                  |
| A          | 1           | spoVT | Bsu0056 | 16077124   | 36589    | K   | 67.7 | 0.12      | transcriptional regulator                                                                                        | transcriptional regulator |
| A          | 1           | sspA  | Bsu2953 | 16080009   | 39493    | -   | 69.8 | 0.23      | small acid-soluble spore protein (alpha-type SASP)                                                               | actuator                  |
| A          | 1           | sspB  | Bsu0975 | 16078040   | 37508    | -   | 74.6 | 0.15      | small acid-soluble spore protein (beta-type SASP)                                                                | actuator                  |
| A          | 1           | sspC  | Bsu1994 | 16079053   | 38532    | -   | 65.7 | 0.00      | small acid-soluble spore protein (alpha/beta-type SASP)                                                          | actuator                  |
| A          | 1           | sspD  | Bsu1349 | 16078411   | 37882    | -   | 67.2 | 0.24      | small acid-soluble spore protein (alpha/beta-type SASP)                                                          | actuator                  |
| A          | 1           | yfkQ  | Bsu0779 | 16077846   | 37312    | -   | 40.6 | 0.31      | similar to spore germination response                                                                            | enzymatic regulator       |
| A          | 1           | yfkR  | Bsu0778 | 16077845   | 37311    | -   | 19.9 | 0.73      | similar to spore germination protein                                                                             | unknown                   |
| A          | 1           | yfkT  | Bsu0776 | 16077843   | 37309    | -   | 21.1 | 0.00      | similar to spore germination protein                                                                             | unknown                   |
| A          | 1           | yndD  | Bsu1776 | 16078838   | 38312    | -   | 41.0 | 0.20      | similar to spore germination protein                                                                             | unknown                   |
| A          | 1           | yndF  | Bsu1778 | 16078840   | 38314    | -   | 22.9 | 0.51      | similar to spore germination protein                                                                             | unknown                   |
| A          | 1           | ytaA  | Bsu3087 | 16080144   | 39628    | -   | 22.4 | 0.16      | similar to spore coat protein                                                                                    | unknown                   |
| B          | 2           | abrB  | Bsu0037 | 16077105   | 36570    | K   | 74.7 | 0.10      | transcriptional regulator                                                                                        | crossstalk                |
| B          | 2           | bofC  | Bsu2771 | 16079827   | 39311    | -   | 34.7 | 0.26      | negatively regulates SpoIVB sigK checkpoint                                                                      | actuator                  |
| B          | 2           | cotB  | Bsu3603 | 16080658   | 40145    | -   | 36.4 | 0.00      | spore coat protein (outer)                                                                                       | actuator                  |
| B          | 2           | cotD  | Bsu2220 | 16079278   | 38758    | -   | 45.2 | 0.00      | spore coat protein (inner)                                                                                       | actuator                  |
| B          | 2           | cotE  | Bsu1704 | 16078766   | 38239    | -   | 58.9 | 0.23      | morphogenic protein                                                                                              | actuator                  |
| B          | 2           | cotF  | Bsu4050 | 16081105   | 40592    | -   | 61.6 | 0.08      | spore coat protein                                                                                               | actuator                  |
| B          | 2           | cotH  | Bsu3604 | 16080659   | 40146    | M   | 46.6 | 0.00      | spore coat protein (inner)                                                                                       | actuator                  |
| B          | 2           | cotJA | Bsu0689 | 16077756   | 37222    | -   | 77.5 | 0.00      | cotJA                                                                                                            | actuator                  |
| B          | 2           | cotK  | Bsu1800 | 16078862   | 38336    | -   | 68.8 | 0.00      | spore coat protein                                                                                               | actuator                  |
| B          | 2           | cotN  | Bsu2460 | 16079518   | 38999    | -   | 41.0 | 0.24      | spore coat-associated protein                                                                                    | actuator                  |
| B          | 2           | cotY  | Bsu1176 | 16078240   | 37709    | -   | 32.7 | 0.00      | spore coat protein (insoluble fraction)                                                                          | actuator                  |
| B          | 2           | cotZ  | Bsu1175 | 16078239   | 37708    | -   | 33.8 | 0.23      | spore coat protein (insoluble fraction)                                                                          | actuator                  |
| B          | 2           | gerCA | Bsu2275 | 16079333   | 38813    | -   | 30.7 | 0.34      | heptaprenyl diphosphate synthase component I                                                                     | sensor                    |
| B          | 2           | gerD  | Bsu0155 | 16077223   | 36688    | -   | 42.9 | 0.17      | germination response to the combination of glucose; fructose; L-asparagine; and KCl                              | transcriptional regulator |
| B          | 2           | gerM  | Bsu2834 | 16079890   | 39374    | R   | 51.9 | 0.16      | cortex hydrolysis and stage II multiple polar septa; putative role in peptidoglycan synthesis during sporulation | actuator                  |

| Module No. | Cluster No. | Gene    | Gene ID | Genbank ID | VIMSS ID | COG | mpi   | $K_a/K_s$ | Function                                                                | Engineering Ontology      |
|------------|-------------|---------|---------|------------|----------|-----|-------|-----------|-------------------------------------------------------------------------|---------------------------|
| B          | 2           | kapB    | Bsu3141 | 16080198   | 39682    | -   | 60.6  | 0.17      | kinase-associated protein B                                             | sensor                    |
| B          | 2           | kinB    | Bsu3140 | 16080197   | 39681    | T   | 94.8  | 0.05      | two-component sensor histidine kinase                                   | enzymatic regulator       |
| B          | 2           | rapA    | Bsu1244 | 16078308   | 37777    | R   | 24.1  | 0.00      | response regulator aspartate phosphatase                                | enzymatic regulator       |
| B          | 2           | rapB    | Bsu3667 | 16080722   | 40209    | R   | 26.9  | 0.00      | response regulator aspartate phosphatase                                | enzymatic regulator       |
| B          | 2           | rapC    | Bsu0378 | 16077445   | 36911    | R   | 26.2  | 0.41      | response regulator aspartate phosphatase                                | enzymatic regulator       |
| B          | 2           | rapE    | Bsu2578 | 16079636   | 39118    | R   | 26.0  | 0.38      | response regulator aspartate phosphatase                                | enzymatic regulator       |
| B          | 2           | sinI    | Bsu2458 | 16079516   | 38997    | -   | 45.5  | 0.00      | antagonist of SinR                                                      | crossstalk                |
| B          | 2           | sinR    | Bsu2459 | 16079517   | 38998    | K   | 68.7  | 0.13      | transcriptional regulator                                               | crossstalk                |
| B          | 2           | spo0B   | Bsu2789 | 16079845   | 39329    | -   | 28.8  | 0.00      | sporulation initiation phosphoprotein                                   | enzymatic regulator       |
| B          | 2           | spoIIB  | Bsu2802 | 16079858   | 39342    | -   | 18.9  | 0.48      | facilitates septal dissolution; engulfment                              | actuator                  |
| B          | 2           | spoIVFA | Bsu2794 | 16079850   | 39334    | M   | 40.7  | 0.25      | inhibitor of SpoIVFB                                                    | actuator                  |
| B          | 2           | spoVAA  | Bsu2343 | 16079401   | 38882    | -   | 50.0  | 0.21      | mutants lead to the production of immature spores (stage V sporulation) | actuator                  |
| B          | 2           | spoVAB  | Bsu2342 | 16079400   | 38881    | -   | 60.9  | 0.18      | mutants lead to the production of immature spores (stage V sporulation) | actuator                  |
| B          | 2           | spoVFA  | Bsu1674 | 16078736   | 38209    | -   | 63.6  | 0.11      | dipicolinate synthase subunit A                                         | enzymatic regulator       |
| B          | 2           | sspE    | Bsu0865 | 16077932   | 37398    | -   | 46.7  | 0.13      | small acid-soluble spore protein (gamma-type SASP)                      | actuator                  |
| B          | 2           | sspF    | Bsu0045 | 16077113   | 36578    | -   | 71.2  | 0.10      | small acid-soluble spore protein (alpha/beta-type SASP)                 | actuator                  |
| B          | 2           | yraD    | Bsu2694 | 16079752   | 39234    | -   | 34.3  | 0.22      | similar to spore coat protein                                           | unknown                   |
| B          | 2           | yraF    | Bsu2691 | 16079749   | 39231    | -   | 35.4  | 0.00      | similar to spore coat protein                                           | unknown                   |
| B          | 2           | yrbB    | Bsu2779 | 16079835   | 39319    | -   | 24.6  | 0.00      | similar to spore coat protein                                           | actuator                  |
| C          | 3           | cgeA    | Bsu1977 | 16079036   | 38515    | -   | 100.0 | 0.00      | alternate gene name: cgeAA                                              | actuator                  |
| C          | 3           | cgeB    | Bsu1978 | 16079037   | 38516    | S   | 27.4  | 0.24      | involved in maturation of the outermost layer of the spore              | actuator                  |
| C          | 3           | cgeC    | Bsu1976 | 16079035   | 38514    | -   | 100.0 | 0.00      | involved in maturation of the outermost layer of the spore              | actuator                  |
| C          | 3           | cgeE    | Bsu1974 | 16079033   | 38512    | K   | 48.4  | 0.00      | involved in maturation of the outermost layer of the spore              | transcriptional regulator |
| C          | 3           | cotC    | Bsu1771 | 16078833   | 38307    | -   | 100.0 | 0.00      | spore coat protein (outer)                                              | actuator                  |
| C          | 3           | cotG    | Bsu3605 | 16080660   | 40147    | -   | 13.7  | 0.00      | morphogenetic protein                                                   | actuator                  |
| C          | 3           | cotL    | Bsu1799 | 16078861   | 38335    | -   | 64.4  | 0.31      | spore coat protein                                                      | actuator                  |
| C          | 3           | cotM    | Bsu1798 | 16078860   | 38334    | O   | 51.5  | 0.00      | spore coat protein (outer)                                              | actuator                  |
| C          | 3           | cotT    | Bsu1210 | 16078274   | 37743    | -   | 100.0 | 0.00      | spore coat protein (inner)                                              | actuator                  |
| C          | 3           | cotW    | Bsu1178 | 16078242   | 37711    | -   | 39.0  | 0.00      | spore coat protein (insoluble fraction)                                 | actuator                  |

| Module No. | Cluster No. | Gene     | Gene ID | Genbank ID | VIMSS ID | COG | mpi   | $K_a/K_s$ | Function                                                                                              | Engineering Ontology      |
|------------|-------------|----------|---------|------------|----------|-----|-------|-----------|-------------------------------------------------------------------------------------------------------|---------------------------|
| C          | 3           | cotX     | Bsu1177 | 16078241   | 37710    | -   | 38.2  | 0.34      | spore coat protein (insoluble fraction)                                                               | actuator                  |
| C          | 3           | csgA     | Bsu0208 | 16077276   | 36741    | -   | 68.3  | 0.00      | sporulation-specific SASP protein                                                                     | actuator                  |
| C          | 3           | phrA     | Bsu1245 | 16078309   | 37778    | -   | 100.0 | 0.00      | inhibitor of the activity of phosphatase RapA                                                         | sensor                    |
| C          | 3           | phrC     | Bsu0379 | 16077446   | 36912    | -   | 100.0 | 0.00      | regulator of the activity of phosphatase RapC and competence and sporulation stimulating factor (CSF) | sensor                    |
| C          | 3           | phrE     | Bsu2579 | 16079637   | 39119    | -   | 100.0 | 0.00      | regulator of the activity of phosphatase RapE                                                         | sensor                    |
| C          | 3           | spo0E    | Bsu1366 | 16078428   | 37899    | -   | 100.0 | 0.00      | negative sporulation regulatory phosphatase                                                           | enzymatic regulator       |
| C          | 3           | spolIIAH | Bsu2434 | 16079492   | 38973    | -   | 39.1  | 0.34      | mutants block sporulation after engulfment                                                            | actuator                  |
| C          | 3           | spolISA  | Bsu1285 | 16078348   | 37818    | -   | 65.7  | 0.00      | alternate gene name: ykaC~lethal when synthesized during vegetative growth in the absence of SpolISB  | actuator                  |
| C          | 3           | spolISB  | Bsu1284 | 16078347   | 37817    | -   | 57.1  | 0.00      | disruption blocks sporulation after septum formation                                                  | actuator                  |
| C          | 3           | spolVCA  | Bsu2572 | 16079630   | 39112    | L   | 20.6  | 0.00      | site-specific DNA recombinase                                                                         | enzymatic regulator       |
| C          | 3           | spolVCB  | Bsu2571 | 16079629   | 39111    | K   | 0.0   | 0.00      | RNA polymerase sporulation-specific sigma factor (sigma-K) (N-terminal half)                          | transcriptional regulator |
| C          | 3           | spoVAE   | Bsu2339 | 16079397   | 38878    | -   | 59.3  | 0.00      | mutants lead to the production of immature spores (stage V sporulation)                               | actuator                  |
| C          | 3           | yisl     | Bsu1073 | 16078137   | 37606    | -   | 50.0  | 0.00      | phosphatase similar to Spo0E; negative regulator                                                      | enzymatic regulator       |
| C          | 3           | ykvT     | Bsu1384 | 16078446   | 37917    | M   | 30.1  | 0.32      | similar to spore cortex-lytic enzyme                                                                  | unknown                   |
| C          | 3           | ynzD     | Bsu1793 | 16078855   | 38329    | -   | 63.0  | 0.00      | phosphatase similar to Spo0E; negative regulator                                                      | enzymatic regulator       |
| C          | 3           | ynzH     | Bsu1768 | 16078830   | 38304    | -   | 9.6   | 0.00      | similar to spore coat protein                                                                         | unknown                   |
| C          | 3           | yobW     | Bsu1910 | 16078971   | 38448    | -   | 33.0  | 0.00      | alternate gene name: csk22~similar to sporulation membrane protein sigma-K-controlled                 | unknown                   |
| C          | 3           | yraE     | Bsu2693 | 16079751   | 39233    | -   | 41.5  | 0.00      | similar to spore coat protein                                                                         | unknown                   |
| C          | 3           | yraG     | Bsu2690 | 16079748   | 39230    | -   | 39.9  | 0.00      | similar to spore coat protein                                                                         | unknown                   |
| C          | 3           | yrbA     | Bsu2780 | 16079836   | 39320    | M   | 50.0  | 0.00      | similar to spore coat protein                                                                         | unknown                   |
| -          | 4           | aprE     | Bsu1030 | 16078094   | 37563    | O   | 13.0  | 0.21      | serine alkaline protease (subtilisin E)                                                               | unknown                   |
| -          | 4           | codY     | Bsu1618 | 16078680   | 38152    | K   | 55.6  | 0.17      | transcriptional regulator                                                                             | crosstalk                 |
| -          | 4           | cotA     | Bsu0630 | 16077697   | 37163    | Q   | 20.3  | 0.44      | spore coat protein (outer)                                                                            | enzymatic regulator       |

| Module No. | Cluster No. | Gene  | Gene ID | Genbank ID | VIMSS ID | COG | mpi  | $K_a/K_s$ | Function                                                                                             | Engineering Ontology      |
|------------|-------------|-------|---------|------------|----------|-----|------|-----------|------------------------------------------------------------------------------------------------------|---------------------------|
| -          | 4           | gerAB | Bsu3303 | 16080359   | 39845    | -   | 16.3 | 0.00      | germination response to L-alanine and related amino acids (earliest stage)                           | sensor                    |
| -          | 4           | gerBB | Bsu3579 | 16080634   | 40121    | -   | 15.6 | 0.38      | germination response to the combination of glucose; fructose; L-asparagine; and KCl (earliest stage) | sensor                    |
| -          | 4           | gerCB | Bsu2274 | 16079332   | 38812    | H   | 31.8 | 0.10      | methyltransferase                                                                                    | sensor                    |
| -          | 4           | gerCC | Bsu2273 | 16079331   | 38811    | H   | 27.6 | 0.24      | heptaprenyl diphosphate synthase component II                                                        | sensor                    |
| -          | 4           | gerE  | Bsu2837 | 16079893   | 39377    | K   | 28.3 | 0.00      | required for the expression of late spore coat genes; transcriptional regulator                      | transcriptional regulator |
| -          | 4           | jag   | Bsu4100 | 16081155   | 40642    | R   | 23.5 | 0.18      | SpolIII-associated protein                                                                           | transcriptional regulator |
| -          | 4           | kinA  | Bsu1401 | 16078463   | 37934    | T   | 15.0 | 0.00      | two-component sensor histidine kinase                                                                | enzymatic regulator       |
| -          | 4           | kinC  | Bsu1451 | 16078513   | 37984    | T   | 19.1 | 0.00      | two-component sensor histidine kinase                                                                | enzymatic regulator       |
| -          | 4           | obg   | Bsu2788 | 16079844   | 39328    | R   | 41.7 | 0.16      | GTPase activity                                                                                      | transcriptional regulator |
| -          | 4           | oppA  | Bsu1144 | 16078208   | 37677    | E   | 17.4 | 0.23      | oligopeptide ABC transporter (binding protein)                                                       | sensor                    |
| -          | 4           | oppB  | Bsu1145 | 16078209   | 37678    | E   | 31.0 | 0.30      | oligopeptide ABC transporter (permease)                                                              | sensor                    |
| -          | 4           | oppC  | Bsu1146 | 16078210   | 37679    | E   | 28.8 | 0.33      | oligopeptide ABC transporter (permease)                                                              | sensor                    |
| -          | 4           | oppD  | Bsu1147 | 16078211   | 37680    | E   | 37.5 | 0.15      | oligopeptide ABC transporter (ATP-binding protein)                                                   | sensor                    |
| -          | 4           | oppF  | Bsu1148 | 16078212   | 37681    | E   | 35.7 | 0.00      | oligopeptide ABC transporter (ATP-binding protein)                                                   | sensor                    |
| -          | 4           | phoP  | Bsu2907 | 16079963   | 39447    | T   | 37.9 | 0.21      | two-component response regulator                                                                     | transcriptional regulator |
| -          | 4           | resD  | Bsu2311 | 16079369   | 38849    | T   | 38.8 | 0.34      | two-component response regulator                                                                     | transcriptional regulator |
| -          | 4           | sigE  | Bsu1534 | 16078596   | 38067    | K   | 36.1 | 0.10      | RNA polymerase sporulation-specific sigma-29 factor (sigma-E); aka SpoIIGB                           | transcriptional regulator |
| -          | 4           | sigF  | Bsu2344 | 16079402   | 38883    | K   | 43.7 | 0.25      | RNA polymerase sporulation-specific sigma factor (sigma-F)                                           | transcriptional regulator |
| -          | 4           | sigG  | Bsu1535 | 16078597   | 38068    | K   | 43.5 | 0.11      | RNA polymerase sporulation-specific sigma factor (sigma-G)                                           | transcriptional regulator |
| -          | 4           | sigH  | Bsu0098 | 16077166   | 36631    | K   | 19.9 | 0.11      | RNA polymerase sigma-30 factor (sigma-H)                                                             | transcriptional regulator |
| -          | 4           | soj   | Bsu4094 | 16081149   | 40636    | D   | 27.2 | 0.15      | homologous to ParA; chromosome partitioning                                                          | transcriptional regulator |
| -          | 4           | spo0A | Bsu2420 | 16079478   | 38959    | T   | 38.9 | 0.08      | two-component response regulator                                                                     | transcriptional regulator |
| -          | 4           | spo0F | Bsu3711 | 16080766   | 40253    | T   | 22.9 | 0.00      | two-component response regulator                                                                     | transcriptional regulator |

| Module No. | Cluster No. | Gene    | Gene ID | Genbank ID | VIMSS ID | COG | mpi  | $K_a/K_s$ | Function                                                                     | Engineering Ontology      |
|------------|-------------|---------|---------|------------|----------|-----|------|-----------|------------------------------------------------------------------------------|---------------------------|
| -          | 4           | spo0J   | Bsu4093 | 16081148   | 40635    | K   | 35.5 | 0.00      | antagonist of Soj; homologous to ParB; chromosome partitioning               | transcriptional regulator |
| -          | 4           | spoIIIC | Bsu2634 | 16079692   | 39174    | K   | 43.0 | 0.00      | RNA polymerase sporulation-specific sigma factor (sigma-K) (C-terminal half) | transcriptional regulator |
| -          | 4           | spoIIIE | Bsu1681 | 16078743   | 38216    | D   | 31.1 | 0.21      | DNA translocase                                                              | transcriptional regulator |
| -          | 4           | spoIIJ  | Bsu4101 | 16081156   | 40643    | U   | 20.9 | 0.16      | membrane protein translocase alternate gene name: spo0J87                    | transcriptional regulator |
| -          | 4           | spoVB   | Bsu2763 | 16079820   | 39303    | R   | 12.6 | 0.31      | alternate gene name: spoIIIF                                                 | transcriptional regulator |
| -          | 4           | spoVC   | Bsu0053 | 16077121   | 36586    | J   | 34.7 | 0.23      | thermosensitive mutant blocks spore coat formation (stage V sporulation)     | transcriptional regulator |
| -          | 4           | spoVD   | Bsu1519 | 16078581   | 38052    | M   | 23.7 | 0.52      | penicillin-binding protein                                                   | transcriptional regulator |
| -          | 4           | spoVE   | Bsu1523 | 16078585   | 38056    | D   | 28.0 | 0.28      | spoVE                                                                        | transcriptional regulator |
| -          | 4           | spoVFB  | Bsu1675 | 16078737   | 38210    | H   | 34.1 | 0.11      | dipicolinate synthase subunit B                                              | enzymatic regulator       |
| -          | 4           | ykvU    | Bsu1385 | 16078447   | 37918    | R   | 0.0  | 0.00      | similar to spore cortex membrane protein                                     | unknown                   |

Table S4. Competence genes

| Module No. | Cluster No. | Gene  | Gene ID | Genbank ID | VIMSS ID | COG | mpi   | Function                                               | Engineering Ontology      |
|------------|-------------|-------|---------|------------|----------|-----|-------|--------------------------------------------------------|---------------------------|
| -          | 1           | acpD  | HI1366  | 16273276   | 7706     | I   | 27.4  | acyl carrier protein phosphodiesterase                 | enzymatic regulator       |
| -          | 1           | cinA  | Bsu1694 | 16078756   | 38229    | R   | 28.6  | competence-damage inducible protein                    | actuator                  |
| -          | 1           | comA  | Bsu3163 | 16080219   | 39704    | T   | 0.0   | two-component response regulator                       | transcriptional regulator |
| -          | 1           | comC  | Bsu2803 | 16079859   | 39343    | N   | 0.0   | DNA-binding protein                                    | transcriptional regulator |
| -          | 1           | comE  | HI0435  | 16272383   | 6785     | U   | 15.5  | competence protein E                                   | actuator                  |
| -          | 1           | comE1 | HI1008  | 16272943   | 7358     | L   | 24.0  | hypothetical protein                                   | unknown                   |
| -          | 1           | comEA | Bsu2555 | 16079613   | 39095    | L   | 26.5  | integral membrane protein                              | actuator                  |
| -          | 1           | comEB | Bsu2554 | 16079612   | 39094    | F   | 21.7  | alternate gene name comD                               | actuator                  |
| -          | 1           | comEC | Bsu2553 | 16079611   | 39093    | R   | 18.8  | putative integral membrane protein                     | actuator                  |
| -          | 1           | comER | Bsu2556 | 16079614   | 39096    | E   | 28.5  | non-essential gene for competence                      | actuator                  |
| -          | 1           | comF  | HI0434  | 16272382   | 6784     | R   | 21.0  | competence protein F                                   | actuator                  |
| -          | 1           | comFA | Bsu3544 | 16080600   | 40086    | L   | 21.2  | late competence protein                                | actuator                  |
| -          | 1           | comFC | Bsu3542 | 16080598   | 40084    | R   | 21.0  | late competence gene                                   | actuator                  |
| -          | 1           | comGA | Bsu2471 | 16079529   | 39010    | N   | 33.8  | late competence gene                                   | actuator                  |
| -          | 1           | comGB | Bsu2470 | 16079528   | 39009    | N   | 24.2  | probably part of the DNA transport machinery           | actuator                  |
| -          | 1           | comM  | HI1117  | 16273042   | 7463     | O   | 42.5  | competence protein                                     | actuator                  |
| -          | 1           | comQ  | Bsu3166 | 16080222   | 39707    | H   | 27.0  | transcriptional regulator                              | transcriptional regulator |
| -          | 1           | crp   | HI0957  | 16272895   | 7307     | T   | 15.8  | catabolite gene activator                              | global regulator          |
| -          | 1           | dprA  | HI0985  | 16272923   | 7337     | L   | 30.9  | DNA processing chain A                                 | actuator                  |
| -          | 1           | pilA  | HI0299  | 16272254   | 6655     | N   | 24.1  | prepilin peptidase-dependent protein D                 | actuator                  |
| -          | 1           | pilB  | HI0298  | 16272253   | 6654     | N   | 36.5  | protein transport protein                              | actuator                  |
| -          | 1           | pilC  | HI0297  | 16272252   | 6653     | N   | 24.1  | protein transport protein                              | actuator                  |
| -          | 1           | pilD  | HI0296  | 16272251   | 6652     | N   | 25.4  | type 4 prepilin-like protein specific leader peptidase | actuator                  |
| -          | 1           | radC  | HI0952  | 30995411   | 7302     | -   | 33.3  | DNA repair protein                                     | actuator                  |
| -          | 1           | rec2  | HI0061  | 16272035   | 6423     | R   | 18.9  | recombination protein                                  | actuator                  |
| -          | 1           | recA  | Bsu1695 | 16078757   | 38230    | L   | 58.5  | multifunctional SOS repair regulator                   | actuator                  |
| -          | 1           | recF  | Bsu0004 | 16077072   | 36537    | L   | 14.1  | recF                                                   | actuator                  |
| -          | 1           | recN  | Bsu2422 | 16079480   | 38961    | L   | 12.2  | recN                                                   | actuator                  |
| -          | 1           | recR  | Bsu0021 | 16077089   | 36554    | L   | 40.7  | alternate gene name recM                               | actuator                  |
| -          | 1           | smf   | Bsu1612 | 16078674   | 38146    | L   | 30.4  | DNA processing Smf protein homolog                     | actuator                  |
| -          | 1           | ssb   | HI0250  | 16272208   | 6608     | L   | 27.6  | single-stranded DNA-binding protein                    | actuator                  |
| -          | 1           | topA  | HI1365  | 16273275   | 7705     | L   | 22.6  | DNA topoisomerase I                                    | actuator                  |
| -          | 1           | -     | HI0365  | 16272313   | 6715     | R   | 36.2  | hypothetical protein                                   | unknown                   |
| -          | 2           | comA  | HI0439  | 16272387   | 6789     | -   | 32.6  | competence protein A                                   | actuator                  |
| -          | 2           | comB  | HI0438  | 16272386   | 6788     | -   | 25.0  | competence protein B                                   | actuator                  |
| -          | 2           | comC  | HI0437  | 16272385   | 6787     | -   | 22.5  | competence protein C                                   | actuator                  |
| -          | 2           | comD  | HI0436  | 16272384   | 6786     | -   | 100.0 | competence protein D                                   | actuator                  |
| -          | 2           | comFB | Bsu3543 | 16080599   | 40085    | -   | 62.8  | late competence gene                                   | actuator                  |
| -          | 2           | comGC | Bsu2469 | 16079527   | 39008    | U   | 25.5  | comGC                                                  | actuator                  |
| -          | 2           | comGD | Bsu2468 | 16079526   | 39007    | N   | 22.5  | probably part of the DNA transport machinery           | actuator                  |
| -          | 2           | comGE | Bsu2467 | 16079525   | 39006    | -   | 28.7  | probably part of the DNA transport machinery           | actuator                  |
| -          | 2           | comGF | Bsu2466 | 16079524   | 39005    | U   | 22.9  | probably part of the DNA transport machinery           | actuator                  |
| -          | 2           | comGG | Bsu2465 | 16079523   | 39004    | -   | 34.7  | probably part of the DNA transport machinery           | actuator                  |
| -          | 2           | comK  | Bsu1042 | 16078106   | 37575    | K   | 31.6  | competence transcription factor                        | crossstalk                |
| -          | 2           | comP  | Bsu3164 | 16080220   | 39705    | T   | 25.6  | two-component sensor histidine kinase                  | unknown                   |
| -          | 2           | comS  | Bsu0351 | 16077419   | 36884    | -   | 100.0 | comS                                                   | transcriptional regulator |
| -          | 2           | comX  | Bsu3165 | 16080221   | 39706    | -   | 100.0 | competence pheromone precursor (aa 46–55)              | sensor                    |
| -          | 2           | cyaA  | HI0604  | 16272546   | 6951     | F   | 44.3  | adenylate cyclase                                      | enzymatic regulator       |
| -          | 2           | mecA  | Bsu1153 | 16078217   | 37686    | O   | 25.4  | mecA                                                   | transcriptional regulator |
| -          | 2           | nin   | Bsu0343 | 16077411   | 36876    | -   | 47.2  | alternate gene name comJ                               | actuator                  |
| -          | 2           | nucA  | Bsu0344 | 16077412   | 36877    | -   | 96.5  | nuclease                                               | actuator                  |
| -          | 2           | phrC  | Bsu0379 | 16077446   | 36912    | -   | 100.0 | regulator of RapC phosphatase activity; CSF            | sensor                    |
| -          | 2           | tfoX  | HI0601  | 16272544   | 6947     | K   | 30.3  | DNA transformation protein                             | actuator                  |
| -          | 2           | yphH  | Bsu2296 | 16079354   | 38834    | O   | 27.7  | similar to negative regulation of competence MecA      | transcriptional regulator |
| -          | 2           | yuxH  | Bsu3169 | 16080225   | 39710    | T   | 28.7  | alternate gene name comB; yufA                         | actuator                  |
| -          | 2           | -     | HI0938  | 16272875   | 7287     | N   | 38.6  | hypothetical protein                                   | enzymatic regulator       |
| -          | 2           | -     | HI0939  | 16272876   | 7288     | U   | 25.6  | hypothetical protein                                   | unknown                   |
| -          | 2           | -     | HI0940  | 16272877   | 7289     | -   | 33.8  | hypothetical protein                                   | unknown                   |
| -          | 2           | -     | HI0941  | 16272878   | 7290     | -   | 45.3  | hypothetical protein                                   | unknown                   |
| -          | 2           | -     | HI1182  | 16273520   | 7527     | -   | 35.2  | hypothetical protein                                   | actuator                  |
| -          | 2           | -     | HI1183  | 16273105   | 7528     | -   | 35.8  | hypothetical protein                                   | actuator                  |
| -          | 2           | -     | HI1631  | 16273520   | 7962     | -   | 100.0 | hypothetical protein                                   | unknown                   |



**Table S5. Statistics for chemotaxis, sporulation, and competence modules. Abbreviations in the column headings: D represents the modularity of a gene group, calculated as the mean of Euclidean distances between each pair of gene phylogenetic profiles. C represents the module coherence, defined as the percent of all species with any module genes (over the minimum noise threshold 5–10%) that have almost all module genes (over 75%).  $P_g$  is the probability of functional enrichment as compared to the hypergeometric distribution. mpi represents the level of sequence conservation, calculated as the median protein identity.  $K_a/K_s$  is the ratio of synonymous to nonsynonymous nucleotide substitutions. Standard deviations are reported in parentheses. Clusters are shown in bold if they were not statistically significant or coherent enough to be called modules, because of either low silhouette, or high D or low coherence C resulting in a P value greater than  $10^{-3}$**

| Module No.   | Cluster No.  | No. of Genes    | Mean silhouette       | D, Intra-module distance |                       | D Random, Genome    | P(D lower than random) | D Random, Network  | P(D lower than network) | C, % module coherence | C, random | P(C greater than random) | Most frequent function | $P_g$           | mpi         |
|--------------|--------------|-----------------|-----------------------|--------------------------|-----------------------|---------------------|------------------------|--------------------|-------------------------|-----------------------|-----------|--------------------------|------------------------|-----------------|-------------|
|              |              |                 |                       | Mean silhouette          | Intra-module distance |                     |                        |                    |                         |                       |           |                          |                        |                 |             |
| E            | 1            | 9               | 0.47                  | 3.41 (1.36)              | 8.65 (0.99)           | 5.29e-04            | 1.02e-04               | 6.45 (0.70)        | 1.02e-04                | 37.0                  | 5.9       | 7.35e-05                 | Crosstalk              | 1.51e-06        | 52.1        |
| B            | 2            | 7               | 0.26                  | 4.07 (1.05)              | 8.67 (0.95)           | 4.39e-03            | 1.03e-14               | 6.33 (0.59)        | 1.03e-14                | 78.2                  | 4.3       | <1.00e-05                | Regulator              | 7.12e-03        | 27.4        |
|              | 3            | 2               | <b>1.00</b>           | -                        | -                     | -                   | -                      | -                  | -                       | -                     | -         | -                        | <b>Crosstalk</b>       | <b>5.74e-02</b> | <b>32.6</b> |
| A            | 4            | 5               | -0.01                 | <b>6.01 (0.83)</b>       | <b>8.80 (1.04)</b>    | <b>1.79e-02</b>     | <1.00e-05              | 6.47 (0.41)        | <1.00e-05               | 85.3                  | 1.6       | <1.00e-05                | <b>Regulator</b>       | <b>5.05e-04</b> | <b>42.5</b> |
|              | 5            | 24              | 0.38                  | 3.43 (1.05)              | 8.69 (0.54)           | 1.79e-02            | <1.00e-05              | 6.47 (0.41)        | <1.00e-05               | -                     | -         | -                        | Actuator               | 9.99e-12        | 29.7        |
| D            | 6            | 3               | -0.10                 | <b>6.47 (0.42)</b>       | <b>9.17 (1.41)</b>    | <b>3.33e-01</b>     | 3.33e-01               | -                  | 3.33e-01                | -                     | -         | -                        | <b>Regulator</b>       | <b>4.31e-01</b> | <b>40.7</b> |
|              | 7            | 4               | 0.21                  | 4.80 (0.59)              | 8.98 (1.48)           | 4.00e-03            | 3.33e-02               | 6.90 (1.04)        | 3.33e-02                | 43.6                  | 4.5       | 6.90e-05                 | Actuator               | 5.25e-02        | 16.7        |
| C            | 8            | 7               | 0.43                  | 3.19 (0.99)              | 8.75 (1.08)           | 1.86e-03            | 6.41e-04               | 6.48 (0.80)        | 6.41e-04                | 74.7                  | 4.3       | <1.00e-05                | Sensor                 | 2.75e-07        | 18.6        |
|              | <b>Total</b> | <b>61</b>       | <b>0.33</b>           | <b>6.58 (2.13)</b>       | <b>8.69 (0.33)</b>    | <b>&lt;1.00e-05</b> | -                      | -                  | -                       | -                     | -         | -                        | -                      | -               | <b>30.0</b> |
| Module No.   | Cluster No.  | No. of Genes    | Mean silhouette       | D, Intra-module distance |                       | D Random, Genome    | P(D lower than random) | D Random, Network  | P(D lower than network) | C, module coherence   | C, random | P(C greater than random) | Most frequent function | $P_g$           | $K_a/K_s$   |
|              |              | Mean silhouette | Intra-module distance |                          |                       |                     |                        |                    |                         |                       |           |                          |                        |                 |             |
| A            | 1            | 47              | 0.78                  | 1.12 (1.21)              | 8.69 (0.37)           | <1.00e-05           | <1.00e-05              | 6.38 (0.77)        | <1.00e-05               | 100.0                 | 1.3       | <1.00e-05                | Actuator               | 2.15e-02        | 54.6        |
|              | 2            | 35              | 0.78                  | 1.70 (0.70)              | 8.64 (0.49)           | <1.00e-05           | <1.00e-05              | 7.07 (0.36)        | <1.00e-05               | 75.0                  | 1.7       | <1.00e-05                | Actuator               | 4.50e-02        | 58.6        |
| C            | 3            | 30              | 0.74                  | 1.90 (0.92)              | 8.67 (0.45)           | <1.00e-05           | 1.16e-05               | 6.37 (0.97)        | 1.16e-05                | 16.7                  | 1.8       | <1.00e-05                | Actuator               | 7.93e-02        | 28.5        |
|              | 4            | 31              | <b>0.46</b>           | <b>7.99 (2.71)</b>       | <b>8.86 (0.31)</b>    | <b>7.69e-02</b>     | -                      | <b>5.79 (0.53)</b> | -                       | -                     | -         | -                        | <b>Regulator</b>       | <b>2.49e-06</b> | <b>49.8</b> |
| <b>Total</b> | -            | <b>153</b>      | <b>0.69</b>           | <b>6.42 (4.73)</b>       | <b>8.69 (0.20)</b>    | <b>&lt;1.00e-05</b> | -                      | -                  | -                       | -                     | -         | -                        | -                      | <b>49.1</b>     | <b>0.24</b> |
| Module No.   | Cluster No.  | No. of Genes    | Mean silhouette       | D, Intra-module distance |                       | D Random, Genome    | P(D lower than random) | D Random, Network  | P(D lower than network) | C, module coherence   | C, random | P(C greater than random) | Most frequent function | $P_g$           | mpi         |
|              |              | Mean silhouette | Intra-module distance |                          |                       |                     |                        |                    |                         |                       |           |                          |                        |                 |             |
| 1            | 1            | 33              | 0.28                  | 7.79 (1.64)              | 8.79 (0.38)           | 5.00e-02            | 1.11e-01               | 8.39 (0.37)        | 1.11e-01                | 52.0                  | 1.4       | <1.00e-05                | Actuator               | 3.15e-02        | 25.2        |
|              | 2            | 29              | 0.64                  | 3.96 (1.81)              | 8.66 (0.49)           | <1.00e-05           | <1.00e-05              | 8.47 (0.37)        | <1.00e-05               | 0.0                   | 1.9       | inf                      | Actuator               | 3.15e-02        | 46.5        |
| <b>Total</b> | -            | <b>62</b>       | <b>0.45</b>           | <b>8.61 (3.24)</b>       | <b>9.08 (0.12)</b>    | <b>1.11e-01</b>     | -                      | -                  | -                       | -                     | -         | -                        | -                      | <b>35.2</b>     | -           |



**Table S6. Z-scores of mutual information between ontology and clustering. The engineering ontology agrees best with the clustering ( $z = 16.14$ ) while the COG Number agrees least ( $z = 1.01$ ). Additional hierarchical ontologies (GO (10), Subtilist (19), KEGG (20)) were also used (data not shown), with qualitatively similar results.**

| Gene function given by:      | Che          | Spo          | Com         |
|------------------------------|--------------|--------------|-------------|
| Engineering Ontology         | <b>16.14</b> | <b>10.08</b> | 0.64        |
| TIGR Primary Role Category   | 4.38         | -            | 5.45        |
| TIGR Secondary Role Category | 5.17         | 1.18         | 5.49        |
| COG Number                   | 1.01         | 0.64         | 6.05        |
| COG Functional Class         | 6.36         | 7.42         | <b>6.49</b> |

Table S7. Percent classification error of the sensitivity and specificity of genes in each network against each phenotype, using linear discriminant analysis. In general, individual modules in each network are more sensitive and specific to their own phenotype than they are to other phenotypes. However, chemotaxis module E classifies better with the sporulation phenotype (7%) than the motility phenotype (40%). We tested classification error for module genes against combinations of phenotypes (motility AND sporulation, sporulation OR competence, and so on (data not shown). We also tested classification error for combinations of modules (chemotaxis module A AND B, B NOT D, and so on) against individual phenotypes (data not shown). For additional classification results, please see [Fig. S12](#)

| Genes       | Percent classification error against phenotype |     |     |
|-------------|------------------------------------------------|-----|-----|
|             | Mot                                            | Spo | Com |
| Chemotaxis  | 8                                              | 11  | 17  |
| Module A    | 17                                             | 28  | 28  |
| Module B    | 12                                             | 29  | 39  |
| Module C    | 18                                             | 19  | 34  |
| Module D    | 26                                             | 33  | 41  |
| Module E    | 40                                             | 7   | 36  |
| Sporulation | 5                                              | 0   | 1   |
| Module A    | 28                                             | 6   | 27  |
| Module B    | 31                                             | 6   | 34  |
| Module C    | 30                                             | 9   | 35  |
| Competence  | 14                                             | 9   | 13  |
| Cluster 2   | 18                                             | 13  | 20  |

Table S8. Genes in *Clostridium acetobutylicum*, a non-transformable bacterium, that are homologous to competence genes. The mean %GC of the genome is 0.32, which is not significantly different from the %GC of any of these genes, indicating that either the genes were part of a larger repertoire of once-functional competence genes, or they were laterally transferred so long ago that their %GC has ameliorated to baseline, genomic levels. Please see Figs. S12–S13 for phylogenetic trees for each of these genes.

| Genbank ID | Gene  | %GC  | Most Homologous To . . . |     |
|------------|-------|------|--------------------------|-----|
| 15896820   | cinA  | 0.36 | <i>B. subtilis</i>       | 62% |
| 15894550   | comEA | 0.31 | <i>S. pneumoniae</i>     | 57% |
| 15896039   | comC  | 0.28 | <i>B. subtilis</i>       | 42% |
|            |       |      | <i>L. innocua</i>        | 41% |
| 15895042   | comM  | 0.32 | <i>H. influenzae</i>     | 60% |

**Table S9. Additional genes with similar phylogenetic profiles to chemotaxis, sporulation, and competence genes.**

|            | Genbank ID | Gene Name | Gene ID | COG Fn. | COG No. | Description          |
|------------|------------|-----------|---------|---------|---------|----------------------|
| Chemotaxis |            |           |         |         |         |                      |
| Module A   | 16079176   | yomZ      | BSU2117 | -       | -       | hypothetical protein |
|            | 16080025   | ytxD      | BSU2973 | N       | COG1291 | hypothetical protein |
|            | 16080474   | yvfG      | BSU3421 | -       | -       | hypothetical protein |
|            | 16080595   | yvyG      | BSU3542 | -       | -       | hypothetical protein |
|            | 16081088   | yyxA      | BSU4036 | O       | COG0265 | hypothetical protein |
| Chemotaxis |            |           |         |         |         |                      |
| Module B   | 16077804   | yfmR      | BSU0737 | R       | COG0488 | hypothetical protein |
|            | 16078460   | ykwC      | BSU1396 | I       | COG2084 | hypothetical protein |
|            | 16079176   | yomZ      | BSU2117 | -       | -       | hypothetical protein |
|            | 16080025   | ytxD      | BSU2973 | N       | COG1291 | hypothetical protein |
|            | 16080595   | yvyG      | BSU3542 | -       | -       | hypothetical protein |
| Chemotaxis |            |           |         |         |         |                      |
| Module C   | 16077804   | yfmR      | BSU0737 | R       | COG0488 | hypothetical protein |
|            | 16078460   | ykwC      | BSU1396 | I       | COG2084 | hypothetical protein |
|            | 16079176   | yomZ      | BSU2117 | -       | -       | hypothetical protein |
|            | 16080025   | ytxD      | BSU2973 | N       | COG1291 | hypothetical protein |
| Chemotaxis |            |           |         |         |         |                      |
| Module D   | 16079176   | yomZ      | BSU2117 | -       | -       | hypothetical protein |
|            | 16080025   | ytxD      | BSU2973 | N       | COG1291 | hypothetical protein |
|            | 16080474   | yvfG      | BSU3421 | -       | -       | hypothetical protein |
|            | 16080595   | yvyG      | BSU3542 | -       | -       | hypothetical protein |
| Chemotaxis |            |           |         |         |         |                      |
| Module E   | 16077102   | yabB      | BSU0034 | R       | COG4123 | hypothetical protein |
|            | 16077116   | yabJ      | BSU0048 | J       | COG0251 | hypothetical protein |
|            | 16077125   | yabM      | BSU0057 | R       | COG2244 | hypothetical protein |
|            | 16077131   | yabR      | BSU0063 | J       | COG1098 | hypothetical protein |
|            | 16077164   | yacO      | BSU0096 | J       | COG0566 | hypothetical protein |
|            | 16077245   | ybbT      | BSU0177 | G       | COG1109 | hypothetical protein |
|            | 16077394   | ycgR      | BSU0325 | R       | COG0701 | hypothetical protein |
|            | 16077920   | yfhH      | BSU0853 | -       | -       | hypothetical protein |
|            | 16077855   | yfkJ      | BSU0788 | T       | COG0394 | hypothetical protein |
|            | 16077846   | yfkQ      | BSU0779 | -       | -       | hypothetical protein |
|            | 16077935   | ygaD      | BSU0869 | V       | COG1132 | hypothetical protein |
|            | 16078046   | yhaZ      | BSU0981 | L       | COG4335 | hypothetical protein |
|            | 16078166   | yitK      | BSU1102 | S       | COG1666 | hypothetical protein |
|            | 16078218   | yjbF      | BSU1153 | R       | COG4469 | hypothetical protein |
|            | 16078224   | yjbL      | BSU1159 | -       | -       | hypothetical protein |
|            | 16078519   | ykrA      | BSU1455 | R       | COG0561 | hypothetical protein |
|            | 16078529   | yktB      | BSU1465 | S       | COG4493 | hypothetical protein |
|            | 16078475   | ykuK      | BSU1411 | S       | COG1978 | hypothetical protein |
|            | 16078530   | ykzI      | BSU1466 | -       | -       | hypothetical protein |
|            | 16078561   | ylbD      | BSU1497 | -       | -       | hypothetical protein |
|            | 16078564   | ylbG      | BSU1500 | S       | COG4471 | hypothetical protein |
|            | 16078565   | ylbH      | BSU1501 | L       | COG0742 | hypothetical protein |
|            | 16078589   | ylxW      | BSU1525 | S       | COG3879 | hypothetical protein |
|            | 16078839   | yndE      | BSU1776 | -       | -       | hypothetical protein |
|            | 16078841   | yndG      | BSU1778 | -       | -       | hypothetical protein |
|            | 16078859   | yneK      | BSU1796 | -       | -       | hypothetical protein |
|            | 16078868   | yneS      | BSU1807 | S       | COG0344 | hypothetical protein |
|            | 16079176   | yomZ      | BSU2117 | -       | -       | hypothetical protein |
|            | 16079121   | yoqI      | BSU2062 | -       | -       | hypothetical protein |
|            | 16078913   | yoxB      | BSU1852 | -       | -       | hypothetical protein |
|            | 16079355   | yphG      | BSU2298 | R       | COG1408 | hypothetical protein |
|            | 16079338   | yphF      | BSU2281 | -       | -       | hypothetical protein |
|            | 16079316   | yphA      | BSU2259 | R       | COG0457 | hypothetical protein |
|            | 16079286   | yppD      | BSU2228 | -       | -       | hypothetical protein |
|            | 16079277   | yphA      | BSU2219 | S       | COG4474 | hypothetical protein |
|            | 16079363   | ypzE      | BSU2306 | -       | -       | hypothetical protein |
|            | 16079590   | yqfC      | BSU2536 | -       | -       | hypothetical protein |
|            | 16079543   | yqgP      | BSU2487 | R       | COG0705 | hypothetical protein |
|            | 16079452   | yqiZ      | BSU2396 | E       | COG1126 | hypothetical protein |
|            | 16079793   | yrrK      | BSU2739 | L       | COG0816 | hypothetical protein |
|            | 16080116   | ytkC      | BSU3064 | R       | COG4824 | hypothetical protein |

|                         | Genbank ID | Gene Name | Gene ID  | COG Fn. | COG No. | Description          |
|-------------------------|------------|-----------|----------|---------|---------|----------------------|
|                         | 16079980   | ytnM      | BSU2928  | R       | COG0730 | hypothetical protein |
|                         | 16080036   | ytpP      | BSU2984  | O       | COG0526 | hypothetical protein |
|                         | 16080090   | ytsC      | BSU3038  | V       | COG1136 | hypothetical protein |
|                         | 16079949   | ytxB      | BSU2897  | S       | COG0398 | hypothetical protein |
|                         | 16080523   | yvcR      | BSU3470  | V       | COG1136 | hypothetical protein |
|                         | 16080576   | yvzD      | BSU3523  | -       | -       | hypothetical protein |
|                         | 16080817   | ywfkK     | BSU3765  | K       | COG0583 | hypothetical protein |
|                         | 16080745   | ywlF      | BSU3692  | G       | COG0698 | hypothetical protein |
|                         | 16080688   | ywpD      | BSU3635  | T       | COG0784 | hypothetical protein |
|                         | 16080636   | ywtG      | BSU3583  | G       | COG0477 | hypothetical protein |
|                         | 16081015   | yxdL      | BSU3964  | V       | COG1136 | hypothetical protein |
|                         | 16081104   | yybS      | BSU4052  | S       | COG4241 | hypothetical protein |
|                         | 16081091   | yycH      | BSU4039  | S       | COG4863 | hypothetical protein |
| Sporulation<br>Module A | 16077085   | yaal      | BSU00170 | Q       | COG1335 | hypothetical protein |
|                         | 16077225   | ybaN      | BSU01570 | G       | COG0726 | hypothetical protein |
|                         | 16077497   | ydaM      | BSU04300 | M       | COG1215 | hypothetical protein |
|                         | 16077603   | ydfC      | BSU05360 | G       | COG0697 | hypothetical protein |
|                         | 16077639   | ydhE      | BSU05720 | G       | COG1819 | hypothetical protein |
|                         | 16077792   | yetO      | BSU07250 | P       | COG0369 | hypothetical protein |
|                         | 16077879   | yfjF      | BSU08120 | S       | COG1742 | hypothetical protein |
|                         | 16077861   | yfkC      | BSU07940 | M       | COG0668 | hypothetical protein |
|                         | 16077834   | yflI      | BSU07670 | -       | -       | hypothetical protein |
|                         | 16077806   | yfmP      | BSU07390 | K       | COG0789 | hypothetical protein |
|                         | 16078064   | yhaH      | BSU10000 | R       | COG4980 | hypothetical protein |
|                         | 16078044   | yheB      | BSU09790 | S       | COG4399 | hypothetical protein |
|                         | 16078043   | yheC      | BSU09780 | -       | -       | hypothetical protein |
|                         | 16078194   | yjaV      | BSU11290 | -       | -       | hypothetical protein |
|                         | 16078245   | yjcB      | BSU11800 | -       | -       | hypothetical protein |
|                         | 16078247   | yjcD      | BSU11820 | L       | COG0210 | hypothetical protein |
|                         | 16078292   | yjlB      | BSU12270 | S       | COG4297 | hypothetical protein |
|                         | 16078197   | yjzB      | BSU11320 | -       | -       | hypothetical protein |
|                         | 16078192   | yjzD      | BSU11270 | -       | -       | hypothetical protein |
|                         | 16078531   | yktC      | BSU14670 | G       | COG0483 | hypothetical protein |
|                         | 16078477   | ykuL      | BSU14130 | R       | COG0517 | hypothetical protein |
|                         | 16078481   | ykuP      | BSU14170 | C       | COG0716 | hypothetical protein |
|                         | 16078541   | ylaG      | BSU14770 | T       | COG1217 | hypothetical protein |
|                         | 16078543   | ylal      | BSU14790 | S       | COG4896 | hypothetical protein |
|                         | 16078559   | ylbB      | BSU14950 | R       | COG0517 | hypothetical protein |
|                         | 16078562   | ylbE      | BSU14980 | -       | -       | hypothetical protein |
|                         | 16078563   | ylbF      | BSU14990 | S       | COG3679 | hypothetical protein |
|                         | 16078574   | ylbP      | BSU15100 | K       | COG0454 | hypothetical protein |
|                         | 16078854   | yneF      | BSU17910 | S       | COG3763 | hypothetical protein |
|                         | 16078924   | yoaK      | BSU18640 | S       | COG3619 | hypothetical protein |
|                         | 16078994   | yocR      | BSU19340 | R       | COG0733 | hypothetical protein |
|                         | 16079020   | yodJ      | BSU19620 | M       | COG1876 | hypothetical protein |
|                         | 16079176   | yomZ      | BSU21170 | -       | -       | hypothetical protein |
|                         | 16079026   | yoze      | BSU19680 | S       | COG4479 | hypothetical protein |
|                         | 16079261   | ypbR      | BSU22030 | R       | COG0699 | hypothetical protein |
|                         | 16079255   | ypeQ      | BSU21960 | -       | -       | hypothetical protein |
|                         | 16079344   | ypgA      | BSU22870 | C       | COG1304 | hypothetical protein |
|                         | 16079339   | yphE      | BSU22820 | -       | -       | hypothetical protein |
|                         | 16079310   | ypjA      | BSU22530 | S       | COG4347 | hypothetical protein |
|                         | 16079285   | yppE      | BSU22270 | -       | -       | hypothetical protein |
|                         | 16079284   | yppF      | BSU22260 | -       | -       | hypothetical protein |
|                         | 16079279   | yprB      | BSU22210 | L       | COG3359 | hypothetical protein |
|                         | 16079378   | yphu      | BSU23210 | K       | COG1386 | hypothetical protein |
|                         | 16079568   | yqfS      | BSU25130 | L       | COG0648 | hypothetical protein |
|                         | 16079564   | yqfW      | BSU25090 | -       | -       | hypothetical protein |
|                         | 16079562   | yqfY      | BSU25070 | I       | COG0821 | hypothetical protein |
|                         | 16079537   | yqgV      | BSU24810 | S       | COG0011 | hypothetical protein |
|                         | 16079535   | yqgX      | BSU24790 | R       | COG0491 | hypothetical protein |
|                         | 16079507   | yqhO      | BSU24510 | R       | COG1752 | hypothetical protein |
|                         | 16079505   | yqhQ      | BSU24490 | R       | COG3872 | hypothetical protein |
|                         | 16079468   | yqiQ      | BSU24120 | G       | COG2513 | hypothetical protein |

|                         | Genbank ID | Gene Name | Gene ID  | COG Fn. | COG No. | Description          |
|-------------------------|------------|-----------|----------|---------|---------|----------------------|
|                         | 16079784   | yrrS      | BSU27300 | -       | -       | hypothetical protein |
|                         | 16080061   | yteU      | BSU30090 | -       | -       | hypothetical protein |
|                         | 16080044   | ytmP      | BSU29920 | M       | COG0510 | hypothetical protein |
|                         | 16079979   | ytol      | BSU29270 | K       | COG4109 | hypothetical protein |
|                         | 16080103   | ytpA      | BSU30510 | I       | COG2267 | hypothetical protein |
|                         | 16080100   | ytqA      | BSU30480 | R       | COG1242 | hypothetical protein |
|                         | 16080086   | ytvA      | BSU30340 | T       | COG2202 | hypothetical protein |
|                         | 16080055   | ytzF      | BSU30030 | J       | COG1187 | hypothetical protein |
|                         | 16080367   | yvqJ      | BSU33140 | G       | COG0477 | hypothetical protein |
|                         | 16080815   | ywfM      | BSU37630 | G       | COG0697 | hypothetical protein |
|                         | 16080757   | ywkB      | BSU37040 | R       | COG0679 | hypothetical protein |
|                         | 16080709   | ywnH      | BSU36560 | M       | COG1247 | hypothetical protein |
|                         | 16080681   | ywqA      | BSU36280 | K       | COG0553 | hypothetical protein |
|                         | 16080731   | ywzB      | BSU36780 | S       | COG4836 | hypothetical protein |
|                         | 16081109   | yybO      | BSU40570 | G       | COG0477 | hypothetical protein |
| Sporulation<br>Module B | 16077125   | yabM      | BSU00570 | R       | COG2244 | hypothetical protein |
|                         | 16077127   | yabO      | BSU00590 | J       | COG1188 | hypothetical protein |
|                         | 16077129   | yabQ      | BSU00610 | -       | -       | hypothetical protein |
|                         | 16077133   | yabS      | BSU00650 | R       | COG2304 | hypothetical protein |
|                         | 16077225   | ybaN      | BSU01570 | G       | COG0726 | hypothetical protein |
|                         | 16077330   | ycbR      | BSU02610 | -       | -       | hypothetical protein |
|                         | 16077352   | ycdF      | BSU02830 | Q       | COG1028 | hypothetical protein |
|                         | 16077363   | yceH      | BSU02940 | P       | COG3853 | hypothetical protein |
|                         | 16077454   | ycnD      | BSU03860 | C       | COG0778 | hypothetical protein |
|                         | 16077533   | ydcE      | BSU04660 | T       | COG2337 | hypothetical protein |
|                         | 16077923   | yfhK      | BSU08570 | -       | -       | hypothetical protein |
|                         | 16077872   | yfjL      | BSU08050 | -       | -       | hypothetical protein |
|                         | 16077861   | yfkC      | BSU07940 | M       | COG0668 | hypothetical protein |
|                         | 16077855   | yfkJ      | BSU07880 | T       | COG0394 | hypothetical protein |
|                         | 16077836   | yfiG      | BSU07690 | J       | COG0024 | hypothetical protein |
|                         | 16078049   | yhaU      | BSU09850 | P       | COG0475 | hypothetical protein |
|                         | 16078044   | yheB      | BSU09790 | S       | COG4399 | hypothetical protein |
|                         | 16078041   | yheE      | BSU09760 | -       | -       | hypothetical protein |
|                         | 16078193   | yjaU      | BSU11280 | -       | -       | hypothetical protein |
|                         | 16078219   | yjbG      | BSU11540 | E       | COG1164 | hypothetical protein |
|                         | 16078221   | yjbl      | BSU11560 | R       | COG2346 | hypothetical protein |
|                         | 16078247   | yjcD      | BSU11820 | L       | COG0210 | hypothetical protein |
|                         | 16078192   | yjzD      | BSU11270 | -       | -       | hypothetical protein |
|                         | 16078373   | ykkB      | BSU13080 | J       | COG1670 | hypothetical protein |
|                         | 16078412   | ykrK      | BSU13480 | -       | -       | hypothetical protein |
|                         | 16078425   | ykrY      | BSU13610 | G       | COG0235 | hypothetical protein |
|                         | 16078531   | yktC      | BSU14670 | G       | COG0483 | hypothetical protein |
|                         | 16078485   | ykuT      | BSU14210 | M       | COG0668 | hypothetical protein |
|                         | 16078543   | ylal      | BSU14790 | S       | COG4896 | hypothetical protein |
|                         | 16078544   | ylaJ      | BSU14800 | -       | -       | hypothetical protein |
|                         | 16078559   | ylbB      | BSU14950 | R       | COG0517 | hypothetical protein |
|                         | 16078562   | ylbE      | BSU14980 | -       | -       | hypothetical protein |
|                         | 16078563   | ylbF      | BSU14990 | S       | COG3679 | hypothetical protein |
|                         | 16078574   | ylbP      | BSU15100 | K       | COG0454 | hypothetical protein |
|                         | 16078601   | ylmD      | BSU15370 | S       | COG1496 | hypothetical protein |
|                         | 16078752   | ymfK      | BSU16890 | -       | -       | hypothetical protein |
|                         | 16078839   | yndE      | BSU17760 | -       | -       | hypothetical protein |
|                         | 16078841   | yndG      | BSU17780 | -       | -       | hypothetical protein |
|                         | 16078847   | yndN      | BSU17840 | E       | COG0346 | hypothetical protein |
|                         | 16078854   | yneF      | BSU17910 | S       | COG3763 | hypothetical protein |
|                         | 16078859   | yneK      | BSU17960 | -       | -       | hypothetical protein |
|                         | 50812241   | yneP      | BSU18040 | -       | -       | hypothetical protein |
|                         | 16078867   | yneR      | BSU18060 | S       | COG4841 | hypothetical protein |
|                         | 16079176   | yomZ      | BSU21170 | -       | -       | hypothetical protein |
|                         | 16079054   | yosZ      | BSU19960 | -       | -       | hypothetical protein |
|                         | 16078934   | yozG      | BSU18740 | K       | COG3655 | hypothetical protein |
|                         | 16079351   | ypdC      | BSU22940 | S       | COG2339 | hypothetical protein |
|                         | 16079349   | ypeB      | BSU22920 | -       | -       | hypothetical protein |
|                         | 16079344   | ypgA      | BSU22870 | C       | COG1304 | hypothetical protein |



|                         | Genbank ID | Gene Name | Gene ID  | COG Fn. | COG No. | Description          |
|-------------------------|------------|-----------|----------|---------|---------|----------------------|
|                         | 16079343   | yphA      | BSU22860 | -       | -       | hypothetical protein |
|                         | 16079339   | yphE      | BSU22820 | -       | -       | hypothetical protein |
|                         | 16079338   | yphF      | BSU22810 | -       | -       | hypothetical protein |
|                         | 16079316   | yphA      | BSU22590 | R       | COG0457 | hypothetical protein |
|                         | 16079286   | yppD      | BSU22280 | -       | -       | hypothetical protein |
|                         | 16079284   | yppF      | BSU22260 | -       | -       | hypothetical protein |
|                         | 16079279   | yprB      | BSU22210 | L       | COG3359 | hypothetical protein |
|                         | 16079680   | yqaL      | BSU26270 | -       | -       | hypothetical protein |
|                         | 16079591   | yqfB      | BSU25370 | -       | -       | hypothetical protein |
|                         | 16079590   | yqfC      | BSU25360 | -       | -       | hypothetical protein |
|                         | 16079568   | yqfS      | BSU25130 | L       | COG0648 | hypothetical protein |
|                         | 16079564   | yqfW      | BSU25090 | -       | -       | hypothetical protein |
|                         | 16079560   | yqgA      | BSU25050 | -       | -       | hypothetical protein |
|                         | 16079535   | yqgX      | BSU24790 | R       | COG0491 | hypothetical protein |
|                         | 16079507   | yqhO      | BSU24510 | R       | COG1752 | hypothetical protein |
|                         | 16079505   | yqhQ      | BSU24490 | R       | COG3872 | hypothetical protein |
|                         | 16079468   | yqiQ      | BSU24120 | G       | COG2513 | hypothetical protein |
|                         | 16079424   | yqkA      | BSU23670 | S       | COG2320 | hypothetical protein |
|                         | 16079823   | yrbF      | BSU27700 | U       | COG1862 | hypothetical protein |
|                         | 50812276   | yrvl      | BSU27590 | -       | -       | hypothetical protein |
|                         | 16079919   | ysfB      | BSU28670 | K       | COG3835 | hypothetical protein |
|                         | 16080010   | ytbJ      | BSU29580 | H       | COG0301 | hypothetical protein |
|                         | 16080137   | ytdA      | BSU30850 | M       | COG1210 | hypothetical protein |
|                         | 16080004   | yteJ      | BSU29520 | S       | COG1714 | hypothetical protein |
|                         | 16080003   | ytfI      | BSU29510 | -       | -       | hypothetical protein |
|                         | 16080116   | ytkC      | BSU30640 | R       | COG4824 | hypothetical protein |
|                         | 16080110   | ytmA      | BSU30580 | E       | COG1506 | hypothetical protein |
|                         | 16080044   | ytmP      | BSU29920 | M       | COG0510 | hypothetical protein |
|                         | 16079979   | ytol      | BSU29270 | K       | COG4109 | hypothetical protein |
|                         | 16080036   | ytpP      | BSU29840 | O       | COG0526 | hypothetical protein |
|                         | 16080097   | ytrB      | BSU30450 | V       | COG1131 | hypothetical protein |
|                         | 16080096   | ytrC      | BSU30440 | -       | -       | hypothetical protein |
|                         | 16079949   | ytxB      | BSU28970 | S       | COG0398 | hypothetical protein |
|                         | 16080566   | yvlA      | BSU35130 | -       | -       | hypothetical protein |
|                         | 16080367   | yvqJ      | BSU33140 | G       | COG0477 | hypothetical protein |
|                         | 16080576   | yvzD      | BSU35230 | -       | -       | hypothetical protein |
|                         | 16080847   | ywdH      | BSU37960 | C       | COG1012 | hypothetical protein |
|                         | 16080844   | ywdK      | BSU37930 | S       | COG2363 | hypothetical protein |
|                         | 16080751   | ywlA      | BSU36980 | -       | -       | hypothetical protein |
|                         | 16080636   | ywtG      | BSU35830 | G       | COG0477 | hypothetical protein |
|                         | 16080731   | ywzB      | BSU36780 | S       | COG4836 | hypothetical protein |
|                         | 16081039   | yxbC      | BSU39880 | S       | COG2850 | hypothetical protein |
|                         | 16080919   | yxID      | BSU38680 | -       | -       | hypothetical protein |
| Sporulation<br>Module C | 16077125   | yabM      | BSU00570 | R       | COG2244 | hypothetical protein |
|                         | 16077127   | yabO      | BSU00590 | J       | COG1188 | hypothetical protein |
|                         | 16077129   | yabQ      | BSU00610 | -       | -       | hypothetical protein |
|                         | 16077133   | yabS      | BSU00650 | R       | COG2304 | hypothetical protein |
|                         | 16077330   | ycbR      | BSU02610 | -       | -       | hypothetical protein |
|                         | 16077533   | ydcE      | BSU04660 | T       | COG2337 | hypothetical protein |
|                         | 16078049   | yhaU      | BSU09850 | P       | COG0475 | hypothetical protein |
|                         | 16078041   | yheE      | BSU09760 | -       | -       | hypothetical protein |
|                         | 16078412   | ykrK      | BSU13480 | -       | -       | hypothetical protein |
|                         | 16078601   | yImD      | BSU15370 | S       | COG1496 | hypothetical protein |
|                         | 16078839   | yndE      | BSU17760 | -       | -       | hypothetical protein |
|                         | 16078841   | yndG      | BSU17780 | -       | -       | hypothetical protein |
|                         | 50812241   | yneP      | BSU18040 | -       | -       | hypothetical protein |
|                         | 16078933   | yoaS      | BSU18730 | -       | -       | hypothetical protein |
|                         | 16079176   | yomZ      | BSU21170 | -       | -       | hypothetical protein |
|                         | 16079054   | yosZ      | BSU19960 | -       | -       | hypothetical protein |
|                         | 16079351   | ypdC      | BSU22940 | S       | COG2339 | hypothetical protein |
|                         | 16079338   | yphF      | BSU22810 | -       | -       | hypothetical protein |
|                         | 16079591   | yqfB      | BSU25370 | -       | -       | hypothetical protein |
|                         | 16079590   | yqfC      | BSU25360 | -       | -       | hypothetical protein |
|                         | 16079823   | yrbF      | BSU27700 | U       | COG1862 | hypothetical protein |

| Genbank ID | Gene Name | Gene ID  | COG Fn. | COG No. | Description          |
|------------|-----------|----------|---------|---------|----------------------|
| 16080010   | ytbJ      | BSU29580 | H       | COG0301 | hypothetical protein |
| 16080137   | ytdA      | BSU30850 | M       | COG1210 | hypothetical protein |
| 16080003   | ytfI      | BSU29510 | -       | -       | hypothetical protein |
| 16079949   | ytxB      | BSU28970 | S       | COG0398 | hypothetical protein |
| 16080576   | yvzD      | BSU35230 | -       | -       | hypothetical protein |
| 16080751   | ywlA      | BSU36980 | -       | -       | hypothetical protein |
| 16080636   | ywtG      | BSU35830 | G       | COG0477 | hypothetical protein |
| 16081039   | yxbC      | BSU39880 | S       | COG2850 | hypothetical protein |
